# Supplementary material
Source: publisher site journal article supplement (https://www.dovepress.com/article/494910)
Supplement: Supplementary file 1 [file get_supplementary_file.php]

# Supplementary Material

# Causal associations between sarcopenia and gestational diabetes mellitus

Yihong Huang1,2*, Shanshan Zhao1,2*, Jiajun Hong1,2, Lixia Shen1,2, Zilian Wang1,2#, Dongyu Wang1,2#

1Department of Obstetrics and Gynecology, The First Affiliated Hospital of Sun Yat-sen University, Guangzhou, China; 2Guangdong Provincial Clinical Research Center for Obstetrical and Gynecological Diseases, Guangzhou, China

*These authors contributed equally to this work

#These authors are considered co-corresponding authors.

Correspondence: Dongyu Wang; Zilian Wang

Department of Obstetrics and Gynecology, The First Affiliated Hospital of Sun Yat-sen University. No.58 Zhongshan Er Road Guangzhou, People’s Republic of China,

Email: [wangdy28@mail.sysu.edu.cn](mailto:wangdy28@mail.sysu.edu.cn); [wangzil@mail.sysu.edu.cn](mailto:wangzil@mail.sysu.edu.cn).

**Supplementary Tables:**

**Table S1** 358 index SNPs represented genetically predicted ALM

| **SNP** | **effect_allele** | **other_allele** | **beta** | **eaf** | **se** | **p value** | **sample size** | **F value** |
| --- | --- | --- | --- | --- | --- | --- | --- | --- |
| rs10054046 | C | T | -0.0175416 | 0.807733 | 0.00321944 | 3.40E-09 | 244730 | 23.39212622 |
| rs10171272 | A | C | 0.0163054 | 0.303214 | 0.0027536 | 9.40E-10 | 244730 | 27.49651025 |
| rs10202701 | T | C | 0.0249771 | 0.543109 | 0.00253881 | 5.40E-24 | 244730 | 75.79408533 |
| rs10211596 | A | G | 0.0205578 | 0.533378 | 0.00252924 | 3.50E-15 | 244730 | 51.49465592 |
| rs10283100 | G | A | 0.0596987 | 0.944363 | 0.00555276 | 7.40E-29 | 244730 | 91.6879577 |
| rs1040977 | T | C | -0.0230556 | 0.165881 | 0.00342814 | 2.10E-11 | 244730 | 36.00465144 |
| rs10425259 | A | G | -0.0147189 | 0.38076 | 0.00262938 | 8.20E-09 | 244730 | 25.00475515 |
| rs1042725 | T | C | -0.0535131 | 0.493072 | 0.00253492 | 1.20E-101 | 244730 | 350.8457399 |
| rs10453441 | G | A | -0.0140157 | 0.401965 | 0.0026248 | 8.50E-09 | 244730 | 23.11546594 |
| rs1047891 | A | C | 0.0280527 | 0.315582 | 0.00270748 | 6.30E-27 | 244730 | 83.22385913 |
| rs10483727 | C | T | -0.0341265 | 0.611286 | 0.00261756 | 7.10E-41 | 244730 | 135.523862 |
| rs1056747 | G | A | -0.0226636 | 0.411809 | 0.00258649 | 5.10E-18 | 244730 | 60.91121837 |
| rs1064048 | T | C | 0.0579185 | 0.061192 | 0.00534451 | 9.20E-29 | 244730 | 94.36059394 |
| rs10770653 | T | G | 0.028285 | 0.689839 | 0.00273739 | 4.60E-27 | 244730 | 83.81335245 |
| rs10776560 | T | C | -0.0153867 | 0.498805 | 0.00253732 | 5.00E-10 | 244730 | 28.97324366 |
| rs10784484 | A | G | 0.0278191 | 0.766361 | 0.00299176 | 3.80E-21 | 244730 | 67.84259746 |
| rs10807137 | T | C | -0.0444976 | 0.824839 | 0.00333816 | 1.30E-40 | 244730 | 140.1023877 |
| rs10821727 | T | C | 0.0181674 | 0.777977 | 0.00307435 | 2.60E-09 | 244730 | 27.90724775 |
| rs10835108 | A | C | 0.0174684 | 0.418523 | 0.00258641 | 5.00E-12 | 244730 | 36.3529651 |
| rs10840346 | A | G | -0.0269453 | 0.501031 | 0.00254659 | 1.10E-28 | 244730 | 88.87489528 |
| rs10842450 | T | C | -0.0168243 | 0.40518 | 0.0025978 | 1.30E-10 | 244730 | 33.39519893 |
| rs10883556 | A | G | 0.03076 | 0.550368 | 0.00255608 | 8.10E-34 | 244730 | 114.6578193 |
| rs10945546 | G | A | 0.0267433 | 0.230284 | 0.00301031 | 1.10E-18 | 244730 | 62.06569229 |
| rs10956488 | G | A | -0.0250973 | 0.153399 | 0.00354485 | 2.40E-12 | 244730 | 40.04456426 |
| rs11014285 | A | G | 0.0388631 | 0.16516 | 0.00346766 | 1.90E-29 | 244730 | 101.9720453 |
| rs11078945 | G | T | -0.0172404 | 0.426481 | 0.00257098 | 1.10E-11 | 244730 | 35.58955286 |
| rs111365325 | T | C | -0.0285187 | 0.230887 | 0.00300894 | 7.30E-21 | 244730 | 70.71177748 |
| rs11154336 | A | G | 0.0173023 | 0.477888 | 0.00253801 | 1.10E-12 | 244730 | 36.56617782 |
| rs111622870 | C | T | -0.032737 | 0.048289 | 0.00594296 | 2.90E-08 | 244730 | 24.10965779 |
| rs11177671 | C | T | 0.0209282 | 0.238374 | 0.00300096 | 2.20E-12 | 244730 | 38.92697706 |
| rs11200607 | T | C | -0.0217151 | 0.246071 | 0.00295632 | 5.10E-14 | 244730 | 42.82602321 |
| rs11217863 | A | G | -0.0311233 | 0.116331 | 0.00397313 | 7.30E-15 | 244730 | 48.74836615 |
| rs11240565 | T | C | 0.0213869 | 0.398182 | 0.00257216 | 1.00E-17 | 244730 | 53.66052223 |
| rs113289555 | T | G | -0.0210778 | 0.232484 | 0.00305006 | 4.50E-12 | 244730 | 38.80763112 |
| rs113827862 | C | T | -0.0300466 | 0.060762 | 0.00541009 | 1.50E-08 | 244730 | 25.22088643 |
| rs113898003 | C | T | -0.0384075 | 0.263104 | 0.00287574 | 3.20E-42 | 244730 | 140.0655792 |
| rs114863726 | A | G | 0.0271887 | 0.125848 | 0.00379477 | 2.20E-13 | 244730 | 39.81053431 |
| rs115098635 | G | A | -0.029818 | 0.054737 | 0.00565463 | 4.40E-08 | 244730 | 22.51893444 |
| rs11575224 | T | C | 0.0315413 | 0.065967 | 0.00510441 | 1.60E-09 | 244730 | 30.00672408 |
| rs11576360 | A | G | 0.0247758 | 0.873382 | 0.00378292 | 7.50E-11 | 244730 | 33.23006808 |
| rs11589349 | T | C | 0.022074 | 0.309522 | 0.00272304 | 2.80E-16 | 244730 | 50.98132426 |
| rs115912456 | G | A | 0.0555579 | 0.041386 | 0.00635535 | 1.30E-19 | 244730 | 59.95321114 |
| rs11605269 | G | A | 0.0166024 | 0.231104 | 0.00302351 | 3.50E-08 | 244730 | 23.97599069 |
| rs116092985 | G | A | -0.0393044 | 0.095669 | 0.00439348 | 2.70E-20 | 244730 | 65.43563275 |
| rs11670755 | A | C | -0.0214823 | 0.154966 | 0.00361792 | 4.70E-10 | 244730 | 29.58297598 |
| rs11672848 | T | C | -0.0184192 | 0.524187 | 0.00259084 | 7.80E-14 | 244730 | 41.42426271 |
| rs117068593 | T | C | 0.0385407 | 0.189176 | 0.00326679 | 1.50E-33 | 244730 | 111.5698839 |
| rs11712872 | A | G | 0.0333179 | 0.11501 | 0.00397197 | 6.40E-18 | 244730 | 55.3152098 |
| rs11720869 | A | G | 0.0169451 | 0.668696 | 0.00270853 | 3.00E-10 | 244730 | 31.139823 |
| rs11721279 | T | G | 0.027714 | 0.094358 | 0.00434874 | 5.10E-10 | 244730 | 32.12979293 |
| rs117663742 | C | T | -0.0175603 | 0.212048 | 0.00310787 | 2.00E-08 | 244730 | 25.22085267 |
| rs1177765 | C | T | -0.0262637 | 0.468435 | 0.0025404 | 1.80E-25 | 244730 | 84.09766765 |
| rs117999064 | G | A | -0.0684794 | 0.016218 | 0.0102949 | 2.10E-11 | 244730 | 36.62673949 |
| rs11874249 | C | T | -0.0180518 | 0.27198 | 0.00288545 | 6.20E-11 | 244730 | 31.58599487 |
| rs12005952 | A | C | 0.0203168 | 0.142117 | 0.00367517 | 2.50E-08 | 244730 | 24.63460618 |
| rs12051245 | C | T | 0.0271322 | 0.232366 | 0.00302179 | 1.70E-19 | 244730 | 64.28772817 |
| rs12072845 | A | G | -0.0255545 | 0.394364 | 0.0025812 | 1.60E-23 | 244730 | 76.36536344 |
| rs12083887 | G | A | 0.022259 | 0.596822 | 0.00256735 | 6.10E-19 | 244730 | 58.36785335 |
| rs12209419 | C | T | -0.0311603 | 0.326575 | 0.0027068 | 1.40E-30 | 244730 | 104.5630285 |
| rs12230946 | A | G | 0.0299406 | 0.091013 | 0.00441791 | 1.10E-12 | 244730 | 36.30477316 |
| rs12314162 | T | C | 0.0341276 | 0.160843 | 0.0034502 | 5.80E-24 | 244730 | 76.96808003 |
| rs1244983 | A | G | 0.0138645 | 0.539684 | 0.00252684 | 1.00E-08 | 244730 | 23.37559766 |
| rs12453808 | C | T | -0.0346058 | 0.113106 | 0.00402726 | 4.80E-19 | 244730 | 58.8134574 |
| rs12509014 | T | C | -0.0279194 | 0.78998 | 0.0031218 | 1.00E-19 | 244730 | 63.3167281 |
| rs12536902 | A | C | 0.0597021 | 0.014277 | 0.0109262 | 2.70E-08 | 244730 | 24.55454226 |
| rs12541381 | A | G | -0.0346071 | 0.258074 | 0.00291068 | 3.30E-32 | 244730 | 112.2927436 |
| rs12546482 | G | A | -0.0202956 | 0.176778 | 0.00334837 | 5.30E-10 | 244730 | 29.34392812 |
| rs1254989 | G | A | 0.0146108 | 0.464951 | 0.00254887 | 2.70E-09 | 244730 | 25.99633177 |
| rs12598856 | T | C | 0.0258275 | 0.401198 | 0.00260034 | 5.40E-24 | 244730 | 78.46268477 |
| rs12609703 | C | T | 0.0197137 | 0.545226 | 0.00256346 | 3.30E-14 | 244730 | 47.17472587 |
| rs12612236 | A | G | 0.0156363 | 0.750066 | 0.00292486 | 2.50E-08 | 244730 | 22.43622709 |
| rs12622189 | G | A | -0.0262266 | 0.258976 | 0.00288034 | 2.60E-20 | 244730 | 64.62605607 |
| rs12639764 | C | T | -0.0329686 | 0.38815 | 0.00261214 | 4.40E-35 | 244730 | 126.4116331 |
| rs12681990 | C | T | 0.033172 | 0.161732 | 0.00345881 | 3.80E-23 | 244730 | 73.04137885 |
| rs12684650 | T | C | -0.0151021 | 0.315795 | 0.00273888 | 6.80E-09 | 244730 | 24.12271512 |
| rs12700901 | A | C | -0.0189999 | 0.404931 | 0.00260029 | 2.70E-14 | 244730 | 42.583735 |
| rs12702693 | T | C | 0.0218258 | 0.454639 | 0.00254958 | 1.40E-17 | 244730 | 57.82437078 |
| rs12713004 | G | A | 0.0410631 | 0.726011 | 0.00283029 | 3.00E-49 | 244730 | 164.2814144 |
| rs12747505 | G | A | 0.0276797 | 0.162499 | 0.00341082 | 1.40E-16 | 244730 | 51.04657023 |
| rs12790261 | A | C | -0.0448195 | 0.082795 | 0.00462545 | 1.10E-22 | 244730 | 74.68859084 |
| rs12829890 | T | C | 0.0201228 | 0.233643 | 0.00300765 | 4.30E-11 | 244730 | 35.49285302 |
| rs1290786 | T | C | -0.0154937 | 0.431819 | 0.00256137 | 1.40E-10 | 244730 | 28.83149126 |
| rs13003510 | A | G | 0.0209226 | 0.294653 | 0.00276935 | 1.80E-14 | 244730 | 44.53907901 |
| rs13037813 | C | T | 0.0298671 | 0.239089 | 0.00299269 | 1.60E-23 | 244730 | 79.45802356 |
| rs13209685 | T | G | 0.0263023 | 0.159251 | 0.00346415 | 4.80E-13 | 244730 | 45.34544302 |
| rs1325596 | A | G | 0.0288713 | 0.547797 | 0.00253499 | 1.40E-31 | 244730 | 101.1072644 |
| rs13290823 | G | A | -0.0167657 | 0.4266 | 0.00257052 | 1.60E-11 | 244730 | 33.65881744 |
| rs1334779 | C | T | 0.0165814 | 0.361427 | 0.00263631 | 8.70E-11 | 244730 | 31.06317645 |
| rs1341215 | A | G | 0.025923 | 0.137979 | 0.00369162 | 3.80E-12 | 244730 | 39.12803111 |
| rs140481490 | T | C | 0.0598076 | 0.024235 | 0.00862963 | 1.50E-12 | 244730 | 41.40870926 |
| rs141494203 | A | G | 0.0765806 | 0.023698 | 0.00835983 | 5.40E-21 | 244730 | 66.43064669 |
| rs1417488 | T | C | 0.0200131 | 0.254241 | 0.00290806 | 3.50E-13 | 244730 | 37.17542944 |
| rs143076454 | A | G | -0.0682358 | 0.018506 | 0.00946984 | 2.10E-12 | 244730 | 41.40144052 |
| rs143384 | G | A | 0.0664158 | 0.40372 | 0.00260585 | 1.70E-150 | 244730 | 520.8514089 |
| rs1443882 | A | G | -0.0264061 | 0.260547 | 0.0028941 | 1.00E-19 | 244730 | 65.77170303 |
| rs144627572 | A | G | 0.0444486 | 0.033143 | 0.00711601 | 9.00E-11 | 244730 | 30.99148847 |
| rs145296160 | C | T | -0.0645346 | 0.017178 | 0.0101844 | 4.20E-11 | 244730 | 34.42001028 |
| rs147461490 | T | C | 0.0509725 | 0.042584 | 0.00734807 | 3.70E-12 | 244730 | 51.85948845 |
| rs150347950 | TC | T | -0.0195885 | 0.185488 | 0.00331884 | 6.80E-09 | 244730 | 28.37809445 |
| rs152353 | G | A | -0.018962 | 0.801229 | 0.00321646 | 3.70E-09 | 244730 | 28.0314081 |
| rs1545853 | A | G | 0.0164882 | 0.276992 | 0.00284844 | 6.00E-09 | 244730 | 26.65147938 |
| rs1547088 | G | A | 0.0157205 | 0.364799 | 0.00266125 | 8.00E-10 | 244730 | 28.03267045 |
| rs17010957 | C | T | -0.0310547 | 0.148314 | 0.00360813 | 9.00E-18 | 244730 | 59.64023723 |
| rs17132288 | T | C | 0.0247105 | 0.425044 | 0.00257817 | 7.40E-21 | 244730 | 73.0597874 |
| rs1718310 | G | A | -0.0201545 | 0.847354 | 0.00353756 | 8.20E-09 | 244730 | 25.71918567 |
| rs17806016 | G | A | -0.018105 | 0.328101 | 0.00272949 | 3.20E-11 | 244730 | 35.37435935 |
| rs17883048 | A | G | -0.037041 | 0.041812 | 0.00646892 | 8.00E-09 | 244730 | 26.90803779 |
| rs1812175 | G | A | 0.0464548 | 0.830989 | 0.00338943 | 6.50E-45 | 244730 | 148.4403542 |
| rs1818782 | C | A | 0.0177742 | 0.656382 | 0.00268406 | 1.00E-11 | 244730 | 34.88123034 |
| rs1835009 | T | C | -0.0208826 | 0.235869 | 0.00301225 | 1.20E-12 | 244730 | 38.47630018 |
| rs1841738 | G | A | -0.0217182 | 0.518632 | 0.00255736 | 6.10E-18 | 244730 | 57.65058013 |
| rs1856760 | T | C | -0.015804 | 0.281539 | 0.00281193 | 4.30E-09 | 244730 | 24.73072764 |
| rs1864180 | G | A | -0.0136959 | 0.511295 | 0.00253667 | 4.10E-08 | 244730 | 22.94338009 |
| rs1864311 | T | C | 0.0187463 | 0.443873 | 0.00257584 | 3.20E-13 | 244730 | 42.46747074 |
| rs187449369 | A | C | -0.0378715 | 0.267189 | 0.00290627 | 1.80E-40 | 244730 | 137.5297849 |
| rs190823861 | A | G | -0.0386104 | 0.046647 | 0.00607501 | 9.60E-12 | 244730 | 32.45344846 |
| rs1923409 | A | G | 0.0307098 | 0.480857 | 0.00254669 | 1.70E-33 | 244730 | 115.2865558 |
| rs1946959 | A | G | 0.0154591 | 0.376572 | 0.00261606 | 2.50E-09 | 244730 | 27.46430938 |
| rs1977337 | C | T | 0.0193438 | 0.851022 | 0.00355034 | 1.60E-08 | 244730 | 23.22228375 |
| rs200652413 | T | G | 0.0165391 | 0.680588 | 0.00270767 | 4.60E-10 | 244730 | 29.10905596 |
| rs2008841 | T | C | -0.0275724 | 0.557957 | 0.00258931 | 3.50E-27 | 244730 | 91.81095197 |
| rs201570119 | C | T | 0.0208696 | 0.209579 | 0.00311898 | 9.00E-12 | 244730 | 35.31948506 |
| rs2035901 | G | A | 0.0222421 | 0.468218 | 0.00255164 | 2.00E-18 | 244730 | 60.30558389 |
| rs2113795 | A | G | 0.0178301 | 0.34439 | 0.00264718 | 6.80E-12 | 244730 | 35.13849991 |
| rs212515 | C | A | 0.0226679 | 0.467924 | 0.00253153 | 1.10E-19 | 244730 | 62.63252284 |
| rs2194411 | A | G | 0.049811 | 0.128546 | 0.00383319 | 8.30E-40 | 244730 | 136.1169616 |
| rs2212926 | A | C | -0.0242687 | 0.210208 | 0.00315842 | 1.20E-14 | 244730 | 47.86930725 |
| rs2225226 | T | C | -0.0668829 | 0.216241 | 0.00311199 | 9.59E-105 | 244730 | 371.6438863 |
| rs2236406 | C | T | 0.0410825 | 0.349299 | 0.00267614 | 1.40E-54 | 244730 | 187.9070522 |
| rs226221 | C | T | 0.0237066 | 0.851022 | 0.00360948 | 1.20E-11 | 244730 | 34.88032882 |
| rs2268759 | A | G | 0.0216933 | 0.595804 | 0.00258616 | 2.20E-18 | 244730 | 55.48330525 |
| rs2270794 | T | C | -0.0305636 | 0.144532 | 0.00361187 | 8.00E-17 | 244730 | 56.54501634 |
| rs2296316 | C | T | -0.0201889 | 0.463669 | 0.00257976 | 3.50E-15 | 244730 | 49.62168751 |
| rs2324154 | A | C | 0.0150898 | 0.510104 | 0.00254281 | 9.50E-10 | 244730 | 27.85455491 |
| rs2345365 | T | C | 0.0201159 | 0.293143 | 0.00281744 | 9.40E-13 | 244730 | 41.04687211 |
| rs2347808 | A | G | -0.0157183 | 0.513857 | 0.00255908 | 4.30E-10 | 244730 | 30.21261233 |
| rs2382532 | A | G | 0.0148807 | 0.423815 | 0.00259805 | 2.50E-09 | 244730 | 26.4697092 |
| rs2416883 | G | A | 0.0206627 | 0.394916 | 0.00259595 | 4.90E-15 | 244730 | 49.94596051 |
| rs244711 | T | C | 0.0276341 | 0.68647 | 0.00293038 | 1.30E-22 | 244730 | 80.473206 |
| rs246181 | T | C | 0.0247863 | 0.373253 | 0.00265794 | 9.40E-22 | 244730 | 70.36570326 |
| rs2489188 | T | C | -0.0163466 | 0.670312 | 0.00268566 | 2.20E-10 | 244730 | 28.9070322 |
| rs2513303 | A | C | 0.0347643 | 0.845935 | 0.00355885 | 2.80E-22 | 244730 | 77.11910826 |
| rs2531991 | A | G | 0.0209059 | 0.747528 | 0.00294653 | 6.90E-13 | 244730 | 40.38008978 |
| rs2607234 | G | A | -0.0383784 | 0.947688 | 0.00578019 | 1.10E-11 | 244730 | 35.74547483 |
| rs2610986 | T | C | -0.0263889 | 0.655364 | 0.00274842 | 6.20E-23 | 244730 | 77.00867305 |
| rs2614791 | C | A | -0.0182381 | 0.209334 | 0.00314038 | 3.80E-09 | 244730 | 26.94989325 |
| rs262680 | T | C | 0.0222036 | 0.425036 | 0.00254868 | 1.00E-18 | 244730 | 58.98410913 |
| rs2651450 | C | T | 0.0224091 | 0.872225 | 0.00381797 | 5.20E-09 | 244730 | 27.39612059 |
| rs2663126 | A | G | -0.0191818 | 0.69097 | 0.00276221 | 2.40E-11 | 244730 | 38.46130397 |
| rs2693560 | G | A | 0.0179954 | 0.628942 | 0.0026309 | 4.10E-12 | 244730 | 36.99629723 |
| rs2712169 | A | G | 0.0173833 | 0.580976 | 0.00256991 | 2.30E-12 | 244730 | 36.0116191 |
| rs2770928 | T | C | 0.0257473 | 0.885637 | 0.00401865 | 1.70E-11 | 244730 | 32.86852446 |
| rs2785070 | C | T | 0.0158705 | 0.446859 | 0.00256755 | 1.30E-10 | 244730 | 30.47606306 |
| rs28463309 | G | A | -0.0218113 | 0.256269 | 0.00292378 | 8.30E-16 | 244730 | 44.38855738 |
| rs28551477 | C | T | 0.0168865 | 0.239359 | 0.00297531 | 1.90E-08 | 244730 | 25.41388639 |
| rs2871960 | C | A | 0.0506768 | 0.444956 | 0.00255125 | 3.50E-90 | 244730 | 310.8359972 |
| rs2885697 | T | G | -0.0322113 | 0.66487 | 0.00266221 | 3.60E-34 | 244730 | 113.2099528 |
| rs2897968 | A | G | 0.0307998 | 0.607179 | 0.00259971 | 8.40E-32 | 244730 | 110.7952162 |
| rs2916261 | G | A | -0.020441 | 0.785927 | 0.00308161 | 1.50E-11 | 244730 | 34.41332624 |
| rs291970 | T | C | 0.024856 | 0.22952 | 0.00302497 | 2.40E-17 | 244730 | 53.48801736 |
| rs292168 | G | A | -0.0311731 | 0.44971 | 0.00255458 | 3.50E-35 | 244730 | 117.763387 |
| rs2977462 | C | T | 0.0162765 | 0.481032 | 0.00257387 | 7.50E-11 | 244730 | 32.37510961 |
| rs2983745 | T | C | -0.01898 | 0.207004 | 0.00318761 | 1.80E-09 | 244730 | 28.94747737 |
| rs2993531 | C | A | 0.0181802 | 0.588626 | 0.00255681 | 2.90E-14 | 244730 | 39.17962924 |
| rs3110496 | G | A | 0.0153975 | 0.686199 | 0.00274046 | 1.00E-08 | 244730 | 24.99000713 |
| rs3114140 | A | G | 0.0230109 | 0.304714 | 0.00276049 | 2.40E-16 | 244730 | 54.92091447 |
| rs31210 | A | G | -0.0300066 | 0.252654 | 0.00292228 | 9.30E-25 | 244730 | 83.24274115 |
| rs3184504 | C | T | 0.0181775 | 0.517141 | 0.00253177 | 1.10E-12 | 244730 | 40.39117486 |
| rs33973388 | T | G | 0.0264797 | 0.434593 | 0.00257573 | 2.80E-27 | 244730 | 84.36006643 |
| rs34276133 | A | C | 0.0392652 | 0.050157 | 0.00577901 | 3.40E-12 | 244730 | 35.9567157 |
| rs34345560 | A | G | 0.0231243 | 0.194361 | 0.00323629 | 1.40E-13 | 244730 | 40.98988845 |
| rs34390533 | A | C | -0.026713 | 0.247087 | 0.00294992 | 3.00E-20 | 244730 | 64.9938926 |
| rs34517439 | A | C | 0.0372833 | 0.122533 | 0.00388728 | 5.10E-22 | 244730 | 73.17447086 |
| rs34647936 | G | T | -0.0271463 | 0.185347 | 0.00329193 | 4.70E-17 | 244730 | 54.4745154 |
| rs34651 | T | C | -0.0379086 | 0.91823 | 0.00465604 | 4.10E-17 | 244730 | 52.82407535 |
| rs346722 | T | C | 0.0203544 | 0.123642 | 0.00382711 | 9.00E-09 | 244730 | 21.97457006 |
| rs34776209 | T | C | -0.0358369 | 0.247653 | 0.00294561 | 1.20E-33 | 244730 | 117.1784518 |
| rs35304341 | A | G | -0.0275623 | 0.089278 | 0.00442043 | 1.50E-10 | 244730 | 30.2365371 |
| rs35309034 | A | C | -0.0360684 | 0.237808 | 0.00302717 | 5.90E-32 | 244730 | 115.4693362 |
| rs35668185 | C | T | -0.0336006 | 0.20701 | 0.00312305 | 9.10E-29 | 244730 | 90.74679911 |
| rs35732917 | C | T | 0.0275092 | 0.284129 | 0.00281075 | 2.10E-22 | 244730 | 75.36282625 |
| rs35756741 | T | C | -0.0401888 | 0.09262 | 0.00439252 | 8.40E-20 | 244730 | 66.45676241 |
| rs35816944 | A | G | -0.0977206 | 0.006638 | 0.0156727 | 6.30E-11 | 244730 | 30.82399621 |
| rs36067528 | A | C | -0.0466681 | 0.07691 | 0.00477551 | 1.80E-24 | 244730 | 75.70396485 |
| rs36083532 | T | C | -0.0207288 | 0.688712 | 0.00274607 | 3.60E-14 | 244730 | 45.09678468 |
| rs36116061 | G | T | -0.024737 | 0.193163 | 0.00323224 | 1.50E-15 | 244730 | 46.6878479 |
| rs36226649 | C | T | 0.04828 | 0.066606 | 0.00512135 | 5.00E-22 | 244730 | 70.95058429 |
| rs3764002 | T | C | 0.0284412 | 0.261427 | 0.00288435 | 1.30E-23 | 244730 | 76.47026351 |
| rs3778928 | A | G | 0.0230819 | 0.104184 | 0.00418729 | 3.90E-08 | 244730 | 24.3401556 |
| rs3782811 | A | C | -0.0164393 | 0.250674 | 0.00293234 | 4.10E-08 | 244730 | 24.8489496 |
| rs3806340 | T | G | 0.0171323 | 0.557465 | 0.00253434 | 3.60E-12 | 244730 | 35.44677074 |
| rs3818416 | C | A | 0.0277227 | 0.764482 | 0.00302069 | 4.00E-21 | 244730 | 67.74852344 |
| rs3822742 | A | C | 0.0162999 | 0.370784 | 0.00262772 | 5.20E-10 | 244730 | 30.34322043 |
| rs3853252 | A | G | 0.0230846 | 0.455084 | 0.00255953 | 1.10E-19 | 244730 | 64.69904031 |
| rs385437 | G | A | 0.0216325 | 0.135694 | 0.00367619 | 7.10E-09 | 244730 | 26.86621446 |
| rs390801 | C | T | -0.020344 | 0.263744 | 0.00289261 | 2.20E-13 | 244730 | 39.34333296 |
| rs407102 | T | C | -0.0151586 | 0.70749 | 0.00276698 | 2.70E-08 | 244730 | 23.27757431 |
| rs4073154 | G | A | 0.0276986 | 0.77808 | 0.00306407 | 7.10E-21 | 244730 | 64.85875699 |
| rs41271299 | T | C | 0.0573039 | 0.05103 | 0.00575824 | 2.80E-23 | 244730 | 77.85773427 |
| rs41271357 | A | G | -0.0173061 | 0.205593 | 0.00313733 | 2.80E-09 | 244730 | 23.94470548 |
| rs41311445 | C | A | -0.0317138 | 0.095436 | 0.0043697 | 8.20E-14 | 244730 | 42.5050687 |
| rs4143843 | T | C | -0.0302892 | 0.44885 | 0.00256815 | 8.20E-33 | 244730 | 111.1376044 |
| rs42039 | T | C | 0.0484921 | 0.245183 | 0.00295897 | 2.30E-61 | 244730 | 213.1912515 |
| rs4239436 | G | A | 0.0411076 | 0.788149 | 0.00312593 | 4.10E-40 | 244730 | 138.1800801 |
| rs4252548 | T | C | -0.0733749 | 0.021601 | 0.00876489 | 4.20E-18 | 244730 | 55.70586871 |
| rs4274112 | G | A | -0.0212087 | 0.372805 | 0.00264187 | 1.60E-15 | 244730 | 51.48977371 |
| rs4288380 | G | A | -0.0213016 | 0.764764 | 0.00300931 | 1.30E-12 | 244730 | 39.96168463 |
| rs4302125 | C | T | -0.0153581 | 0.478109 | 0.00257933 | 2.30E-09 | 244730 | 28.81044976 |
| rs4341733 | C | T | -0.0222493 | 0.376037 | 0.00263691 | 7.50E-18 | 244730 | 56.86436914 |
| rs45474992 | T | C | -0.0552283 | 0.036052 | 0.00691849 | 1.80E-15 | 244730 | 51.89381577 |
| rs45528934 | T | C | 0.0210585 | 0.162289 | 0.00345994 | 8.30E-10 | 244730 | 29.51261851 |
| rs4592924 | A | G | -0.018433 | 0.74235 | 0.00292499 | 4.70E-10 | 244730 | 31.81299542 |
| rs4622329 | A | G | 0.0187499 | 0.349767 | 0.00267564 | 9.00E-13 | 244730 | 39.1410444 |
| rs4640244 | G | A | -0.0195556 | 0.399837 | 0.00259866 | 1.30E-14 | 244730 | 44.925344 |
| rs4708562 | G | A | 0.0164507 | 0.513878 | 0.00253704 | 1.70E-11 | 244730 | 33.09405592 |
| rs4735766 | T | G | 0.0326556 | 0.285889 | 0.00281488 | 5.50E-31 | 244730 | 106.6067863 |
| rs4752829 | A | G | 0.0345099 | 0.285597 | 0.0028248 | 7.10E-35 | 244730 | 118.9905922 |
| rs4763327 | C | T | -0.0150699 | 0.301943 | 0.00276785 | 3.80E-08 | 244730 | 23.43124568 |
| rs4776625 | A | G | -0.0191427 | 0.396004 | 0.00261775 | 1.70E-13 | 244730 | 42.9075151 |
| rs4854645 | A | G | -0.0167167 | 0.461939 | 0.00254765 | 2.50E-11 | 244730 | 34.00124201 |
| rs488621 | G | A | 0.0192563 | 0.468788 | 0.00252104 | 3.20E-14 | 244730 | 45.20510358 |
| rs4889336 | C | T | -0.02103 | 0.251124 | 0.0029579 | 3.50E-14 | 244730 | 40.71609625 |
| rs4894522 | G | A | 0.0160279 | 0.644941 | 0.00266608 | 8.70E-10 | 244730 | 28.79665647 |
| rs4903321 | A | G | -0.0152276 | 0.443742 | 0.00257558 | 5.70E-10 | 244730 | 28.01796898 |
| rs4940462 | G | A | 0.0184925 | 0.80479 | 0.00322971 | 1.00E-09 | 244730 | 26.29903184 |
| rs4951391 | G | A | 0.0174669 | 0.715253 | 0.00279289 | 2.20E-09 | 244730 | 30.41737232 |
| rs4982404 | T | C | 0.0249516 | 0.541017 | 0.00257146 | 6.20E-23 | 244730 | 75.69301776 |
| rs498685 | C | T | -0.0173593 | 0.594069 | 0.00260196 | 7.00E-13 | 244730 | 35.5740947 |
| rs55800172 | A | G | 0.0369828 | 0.064161 | 0.00516759 | 4.80E-13 | 244730 | 40.2031781 |
| rs56207600 | A | G | 0.0225681 | 0.111056 | 0.00407463 | 4.90E-09 | 244730 | 24.61315615 |
| rs56363908 | G | A | -0.0468923 | 0.042371 | 0.00630455 | 2.50E-14 | 244730 | 43.67810444 |
| rs5742915 | C | T | 0.0254189 | 0.461325 | 0.00256066 | 3.20E-23 | 244730 | 78.61474463 |
| rs5753518 | A | G | 0.0257066 | 0.090593 | 0.00449242 | 6.50E-09 | 244730 | 26.65058283 |
| rs57696574 | C | A | 0.0184717 | 0.397623 | 0.0026926 | 2.40E-12 | 244730 | 40.00753639 |
| rs584001 | T | G | -0.0145113 | 0.586124 | 0.00256865 | 4.50E-09 | 244730 | 25.00540926 |
| rs58661897 | T | C | 0.0252995 | 0.226616 | 0.00313075 | 6.90E-16 | 244730 | 54.91921017 |
| rs58670122 | G | A | -0.0252129 | 0.142677 | 0.00364168 | 2.60E-13 | 244730 | 38.06525972 |
| rs59950280 | A | G | -0.029408 | 0.330829 | 0.0027316 | 3.30E-28 | 244730 | 93.74652937 |
| rs59985551 | T | C | -0.0366168 | 0.226005 | 0.00301129 | 9.10E-35 | 244730 | 114.8518383 |
| rs6014524 | T | C | -0.0175486 | 0.196464 | 0.00322306 | 2.10E-08 | 244730 | 23.79757505 |
| rs6038571 | C | A | -0.0202434 | 0.515975 | 0.00255632 | 1.10E-15 | 244730 | 50.10366289 |
| rs604723 | C | T | -0.016663 | 0.724494 | 0.00286758 | 6.30E-09 | 244730 | 27.12923762 |
| rs60836537 | G | A | 0.0159778 | 0.45886 | 0.00253244 | 4.00E-10 | 244730 | 31.03102127 |
| rs60979342 | T | C | -0.0163408 | 0.288507 | 0.00281471 | 3.80E-09 | 244730 | 26.83109722 |
| rs61546108 | A | G | -0.0195336 | 0.162597 | 0.00343609 | 1.60E-08 | 244730 | 25.43161588 |
| rs61776719 | A | C | -0.0201863 | 0.555126 | 0.00253314 | 1.40E-16 | 244730 | 49.26592751 |
| rs61827272 | C | T | 0.0162961 | 0.27549 | 0.00281917 | 1.10E-08 | 244730 | 25.94662249 |
| rs61944841 | A | G | 0.0253586 | 0.414271 | 0.00267644 | 9.50E-22 | 244730 | 76.39845334 |
| rs62027209 | G | A | 0.0179406 | 0.252385 | 0.00294279 | 1.70E-09 | 244730 | 29.7293513 |
| rs62106258 | C | T | -0.0491078 | 0.04884 | 0.0058445 | 5.70E-18 | 244730 | 54.84596905 |
| rs62172472 | A | G | 0.0190166 | 0.19952 | 0.00316321 | 3.70E-10 | 244730 | 28.27287938 |
| rs62310772 | T | C | 0.0156161 | 0.47096 | 0.00254329 | 2.00E-09 | 244730 | 29.74319921 |
| rs62370472 | C | T | -0.0283342 | 0.20848 | 0.00312603 | 4.80E-21 | 244730 | 64.86052995 |
| rs62370525 | A | G | 0.0395822 | 0.100121 | 0.00428325 | 9.00E-21 | 244730 | 69.11128785 |
| rs62428920 | C | T | -0.0161134 | 0.382237 | 0.00261791 | 7.30E-10 | 244730 | 30.0123122 |
| rs62430477 | T | C | 0.0239251 | 0.140578 | 0.00366849 | 5.50E-11 | 244730 | 33.85389391 |
| rs62466110 | C | T | -0.0370385 | 0.067105 | 0.00544473 | 7.30E-12 | 244730 | 42.04227741 |
| rs62501195 | C | A | -0.0190934 | 0.171258 | 0.00343223 | 1.20E-08 | 244730 | 25.32788403 |
| rs62532512 | A | C | 0.0160397 | 0.536155 | 0.00258485 | 7.40E-10 | 244730 | 31.32048694 |
| rs62621812 | A | G | 0.0846903 | 0.020179 | 0.00930203 | 1.50E-20 | 244730 | 69.43111281 |
| rs6425817 | G | A | 0.0180618 | 0.672322 | 0.00268046 | 1.70E-11 | 244730 | 35.18246794 |
| rs6478243 | C | T | 0.0250016 | 0.393783 | 0.00262535 | 2.60E-22 | 244730 | 73.05795537 |
| rs6543146 | G | T | 0.0174031 | 0.557026 | 0.00255219 | 1.40E-12 | 244730 | 36.58382045 |
| rs6544743 | G | T | -0.0235963 | 0.808927 | 0.00320916 | 3.20E-14 | 244730 | 42.12970656 |
| rs6546177 | T | G | -0.0150937 | 0.421828 | 0.00255772 | 2.20E-09 | 244730 | 27.19877578 |
| rs6556933 | T | C | -0.0139454 | 0.42284 | 0.00256615 | 4.00E-08 | 244730 | 23.23232487 |
| rs659418 | G | T | 0.0302824 | 0.139585 | 0.00368135 | 6.70E-16 | 244730 | 53.91879605 |
| rs6669122 | G | A | -0.0186445 | 0.552474 | 0.00253562 | 2.10E-14 | 244730 | 42.07493595 |
| rs6693113 | T | G | 0.0196128 | 0.499423 | 0.0025147 | 1.50E-15 | 244730 | 47.0781482 |
| rs670318 | C | T | 0.041229 | 0.951587 | 0.00585874 | 1.20E-11 | 244730 | 38.33551733 |
| rs6718026 | T | C | -0.0208531 | 0.585599 | 0.00256406 | 3.10E-16 | 244730 | 51.66200389 |
| rs6721000 | G | A | 0.0290301 | 0.684356 | 0.0027161 | 2.30E-27 | 244730 | 89.13577348 |
| rs6721191 | G | A | -0.0166859 | 0.577285 | 0.00255467 | 9.70E-12 | 244730 | 33.25932481 |
| rs67362530 | A | G | -0.034167 | 0.116818 | 0.00397965 | 7.10E-19 | 244730 | 58.96516296 |
| rs6773931 | A | C | -0.0160122 | 0.420872 | 0.00256923 | 1.80E-10 | 244730 | 30.59131163 |
| rs6794287 | T | C | 0.0195234 | 0.3485 | 0.00267129 | 1.80E-13 | 244730 | 42.36629531 |
| rs6802104 | T | C | -0.0158613 | 0.627484 | 0.00262614 | 8.70E-10 | 244730 | 28.78680286 |
| rs68049170 | A | G | -0.0256358 | 0.275533 | 0.0028597 | 6.50E-20 | 244730 | 64.22692729 |
| rs680882 | G | T | 0.0171825 | 0.76011 | 0.0029802 | 3.80E-09 | 244730 | 26.35270887 |
| rs68128210 | G | T | 0.0204471 | 0.32756 | 0.0027054 | 3.30E-14 | 244730 | 45.08219411 |
| rs6824748 | A | G | -0.0658578 | 0.159492 | 0.00346841 | 1.30E-81 | 244730 | 284.9165744 |
| rs6838153 | G | A | 0.0208942 | 0.31887 | 0.00272474 | 2.00E-13 | 244730 | 46.41888861 |
| rs6874142 | G | T | 0.0248379 | 0.11381 | 0.00421966 | 3.90E-09 | 244730 | 30.45848309 |
| rs6902285 | C | A | 0.0198515 | 0.724263 | 0.00284156 | 1.00E-12 | 244730 | 38.52685614 |
| rs6946050 | C | A | -0.0292551 | 0.552841 | 0.00255951 | 3.70E-31 | 244730 | 103.6015877 |
| rs6977416 | A | G | 0.0418518 | 0.334008 | 0.00271272 | 2.40E-57 | 244730 | 190.8578079 |
| rs7009178 | A | G | 0.0168351 | 0.718581 | 0.00282807 | 4.90E-10 | 244730 | 28.05611527 |
| rs7016759 | C | T | 0.0253493 | 0.167105 | 0.0034098 | 1.60E-13 | 244730 | 43.78310301 |
| rs706402 | C | T | 0.0298006 | 0.198317 | 0.00315857 | 1.60E-21 | 244730 | 69.12776193 |
| rs7095472 | G | A | 0.0254855 | 0.534457 | 0.00256061 | 1.90E-21 | 244730 | 79.12550331 |
| rs7107356 | G | A | 0.0173737 | 0.506941 | 0.00254511 | 3.70E-12 | 244730 | 36.93377397 |
| rs7147721 | G | A | -0.0215065 | 0.461747 | 0.00256428 | 7.30E-18 | 244730 | 56.27909237 |
| rs7225068 | G | A | 0.0164943 | 0.590686 | 0.00258903 | 8.30E-11 | 244730 | 32.19996497 |
| rs7229520 | A | G | -0.0248989 | 0.662089 | 0.00270921 | 4.00E-22 | 244730 | 67.90734025 |
| rs7253742 | C | T | -0.0186182 | 0.402176 | 0.00260459 | 2.80E-13 | 244730 | 40.79946619 |
| rs72570684 | TTAC | T | 0.0203052 | 0.440781 | 0.00256139 | 1.80E-15 | 244730 | 49.75363507 |
| rs72656010 | C | T | -0.0706416 | 0.131952 | 0.00376831 | 7.10E-80 | 244730 | 280.0881498 |
| rs7265615 | T | G | -0.0166419 | 0.24131 | 0.00298746 | 7.40E-09 | 244730 | 24.82028391 |
| rs72744822 | A | G | -0.0291425 | 0.079306 | 0.00466713 | 4.30E-10 | 244730 | 30.35610462 |
| rs72759809 | T | C | 0.0223249 | 0.193201 | 0.00323019 | 3.00E-12 | 244730 | 38.03106223 |
| rs72771070 | T | C | 0.0172058 | 0.282612 | 0.00285317 | 3.10E-10 | 244730 | 29.38081161 |
| rs72801818 | T | C | 0.0304894 | 0.30018 | 0.00278396 | 1.30E-28 | 244730 | 95.6208763 |
| rs72885915 | A | G | -0.0371503 | 0.246798 | 0.00292162 | 9.20E-39 | 244730 | 125.6370855 |
| rs72894003 | T | C | -0.0424983 | 0.064598 | 0.00515073 | 2.00E-17 | 244730 | 53.42843965 |
| rs73000817 | A | G | -0.0256089 | 0.196317 | 0.0031814 | 2.60E-16 | 244730 | 50.65608588 |
| rs7301341 | C | T | -0.0237611 | 0.32715 | 0.00270386 | 1.90E-19 | 244730 | 60.84479501 |
| rs73186333 | C | A | 0.0491099 | 0.024083 | 0.00844919 | 5.50E-10 | 244730 | 27.7477653 |
| rs7366282 | C | A | -0.0307537 | 0.05199 | 0.00569567 | 1.80E-08 | 244730 | 22.81839954 |
| rs74416750 | T | C | -0.0233452 | 0.149886 | 0.00357182 | 1.20E-11 | 244730 | 33.99468053 |
| rs74494415 | T | C | -0.0402678 | 0.039249 | 0.00663636 | 7.60E-10 | 244730 | 29.931299 |
| rs745749 | G | A | -0.0173971 | 0.335771 | 0.00270557 | 3.10E-10 | 244730 | 33.0438451 |
| rs7497684 | A | C | 0.0192674 | 0.480105 | 0.0025703 | 5.70E-14 | 244730 | 45.36237607 |
| rs750739 | G | A | -0.0280864 | 0.166661 | 0.0034254 | 2.60E-17 | 244730 | 53.63647421 |
| rs75272640 | T | C | -0.0211497 | 0.148113 | 0.00356359 | 3.20E-09 | 244730 | 27.62802395 |
| rs75451331 | T | G | 0.0247137 | 0.084055 | 0.00461297 | 1.60E-08 | 244730 | 23.01794463 |
| rs758100 | T | C | 0.0162218 | 0.236233 | 0.00301419 | 2.60E-08 | 244730 | 23.24117002 |
| rs7633464 | A | G | 0.0185187 | 0.478524 | 0.00253623 | 5.50E-14 | 244730 | 41.89388018 |
| rs76364830 | A | G | -0.048277 | 0.063174 | 0.00527678 | 9.00E-20 | 244730 | 67.53282118 |
| rs7648704 | T | G | 0.0155668 | 0.662363 | 0.00267883 | 2.70E-10 | 244730 | 26.52827853 |
| rs76517946 | A | C | -0.0423711 | 0.081336 | 0.00464641 | 7.50E-19 | 244730 | 65.67691213 |
| rs765634 | G | A | -0.014834 | 0.366553 | 0.00265586 | 1.20E-08 | 244730 | 25.01066266 |
| rs7701233 | C | T | -0.0158911 | 0.428209 | 0.00256182 | 1.60E-10 | 244730 | 30.26717876 |
| rs7768382 | C | T | -0.0197831 | 0.477663 | 0.00253496 | 1.10E-14 | 244730 | 47.80387637 |
| rs7774095 | A | C | -0.0219365 | 0.285585 | 0.00280711 | 3.50E-15 | 244730 | 48.06435539 |
| rs77810971 | A | G | -0.0266564 | 0.094944 | 0.00434087 | 1.10E-09 | 244730 | 29.88933232 |
| rs77889556 | A | G | 0.0253175 | 0.167686 | 0.00356636 | 3.70E-13 | 244730 | 43.79459943 |
| rs7792578 | T | C | -0.0146251 | 0.528069 | 0.0025566 | 6.80E-09 | 244730 | 26.09338223 |
| rs77978038 | G | T | 0.0397284 | 0.22742 | 0.00303495 | 1.00E-38 | 244730 | 135.8102073 |
| rs781658 | A | G | 0.0208391 | 0.185464 | 0.00326982 | 1.80E-10 | 244730 | 32.1145629 |
| rs78378222 | G | T | 0.134446 | 0.012095 | 0.0119028 | 1.40E-30 | 244730 | 105.7600563 |
| rs7843128 | C | T | -0.0149423 | 0.356574 | 0.00266054 | 1.80E-08 | 244730 | 25.07522762 |
| rs78457529 | T | C | -0.0972728 | 0.011605 | 0.0119129 | 5.00E-17 | 244730 | 53.13369335 |
| rs7845911 | C | T | -0.0196291 | 0.227029 | 0.00303749 | 9.80E-12 | 244730 | 33.09948614 |
| rs7853634 | C | T | -0.048965 | 0.201958 | 0.00317149 | 2.70E-53 | 244730 | 189.2828655 |
| rs7858712 | G | A | 0.0337017 | 0.914093 | 0.00454341 | 3.10E-13 | 244730 | 43.66336841 |
| rs7957882 | A | C | -0.0297541 | 0.665411 | 0.00269481 | 6.20E-29 | 244730 | 96.51253287 |
| rs798528 | C | A | -0.0379867 | 0.30644 | 0.0027556 | 1.30E-42 | 244730 | 150.2022009 |
| rs80154573 | C | T | -0.0194148 | 0.18324 | 0.00334251 | 8.90E-09 | 244730 | 27.61511106 |
| rs8031704 | A | C | -0.0250538 | 0.327406 | 0.00272439 | 3.50E-21 | 244730 | 67.67435394 |
| rs8077653 | G | T | 0.0500509 | 0.649332 | 0.00266662 | 7.20E-83 | 244730 | 279.5114898 |
| rs8078513 | A | C | 0.0335958 | 0.056785 | 0.0055847 | 9.20E-10 | 244730 | 29.59266111 |
| rs8117259 | T | C | -0.0228285 | 0.180179 | 0.00336287 | 3.90E-12 | 244730 | 37.68443759 |
| rs861585 | A | G | -0.0151227 | 0.454671 | 0.00254475 | 1.70E-09 | 244730 | 27.75754057 |
| rs905938 | C | T | 0.0345421 | 0.265192 | 0.00285216 | 1.90E-35 | 244730 | 113.8547025 |
| rs9277625 | T | C | 0.0208584 | 0.109382 | 0.00406449 | 3.80E-08 | 244730 | 20.7469057 |
| rs9298225 | T | C | 0.021732 | 0.165506 | 0.00342651 | 5.90E-11 | 244730 | 31.93083091 |
| rs9321170 | A | G | 0.0173253 | 0.727448 | 0.00285119 | 1.20E-09 | 244730 | 29.13276837 |
| rs9357470 | T | C | 0.0221664 | 0.398513 | 0.00258661 | 1.30E-17 | 244730 | 57.6605244 |
| rs9384679 | T | C | -0.017089 | 0.370496 | 0.00261928 | 1.40E-10 | 244730 | 33.34200308 |
| rs9391254 | T | C | 0.0277321 | 0.320308 | 0.00271731 | 5.60E-25 | 244730 | 81.98003913 |
| rs9521733 | C | T | 0.0166589 | 0.376879 | 0.00263561 | 7.30E-11 | 244730 | 31.90368048 |
| rs9577090 | T | G | -0.0165065 | 0.301939 | 0.00278592 | 1.80E-09 | 244730 | 28.11186573 |
| rs9634212 | A | C | 0.0512427 | 0.221446 | 0.00306093 | 1.70E-63 | 244730 | 221.7845012 |
| rs9809116 | G | A | -0.0176529 | 0.408223 | 0.00259626 | 1.60E-11 | 244730 | 36.85278159 |
| rs9894577 | A | G | -0.0313296 | 0.317544 | 0.00273827 | 3.80E-31 | 244730 | 104.1574336 |
| rs9905385 | G | A | -0.0356199 | 0.670641 | 0.00271905 | 4.00E-39 | 244730 | 137.2479049 |
| rs9908143 | C | T | -0.0289647 | 0.819086 | 0.00330453 | 1.20E-18 | 244730 | 60.86462495 |
| rs9960619 | T | C | 0.0184577 | 0.344523 | 0.00269538 | 1.30E-12 | 244730 | 37.66299742 |

**Abbreviations:** ALM, Appendicular lean mass; SNPs, single-nucleotide polymorphisms.

**Table S2** 146 index SNPs represented genetically predicted right-hand grip strength

| **SNP** | **effect_allele** | **other_allele** | **beta** | **eaf** | **se** | **p value** | **sample size** | **F value** |
| --- | --- | --- | --- | --- | --- | --- | --- | --- |
| rs10278546 | C | A | 0.0107539 | 0.194705 | 0.00188373 | 1.09999E-08 | 461089 | 16.72224576 |
| rs1043515 | G | A | 0.0138281 | 0.566183 | 0.00149848 | 2.80027E-20 | 461089 | 43.31556352 |
| rs1047891 | A | C | 0.0096867 | 0.315772 | 0.0015965 | 1.29999E-09 | 461089 | 18.69642305 |
| rs10483727 | C | T | -0.00901803 | 0.610138 | 0.00152456 | 3.29997E-09 | 461089 | 17.83996065 |
| rs10520770 | C | T | 0.011742 | 0.44929 | 0.00149773 | 4.49987E-15 | 461089 | 31.46141537 |
| rs10761411 | T | C | -0.0114975 | 0.812419 | 0.00202082 | 1.29999E-08 | 461089 | 18.57838723 |
| rs10770125 | G | A | 0.00844132 | 0.477072 | 0.00148775 | 1.40001E-08 | 461089 | 16.39369122 |
| rs10784502 | T | C | -0.0111247 | 0.512218 | 0.00148608 | 7.10068E-14 | 461089 | 28.51667187 |
| rs10798483 | A | G | 0.0145083 | 0.54729 | 0.00149469 | 2.80027E-22 | 461089 | 48.09840927 |
| rs10799428 | T | C | -0.0143588 | 0.18721 | 0.00190367 | 4.60045E-14 | 461089 | 28.93248225 |
| rs10846071 | T | C | -0.0156575 | 0.393685 | 0.00151902 | 6.4998E-25 | 461089 | 53.97064518 |
| rs11022513 | T | C | -0.00921054 | 0.569312 | 0.00151016 | 1.09999E-09 | 461089 | 19.18298205 |
| rs11039348 | A | G | -0.00976855 | 0.348363 | 0.00156104 | 3.89996E-10 | 461089 | 19.97705835 |
| rs112330055 | A | G | 0.0179824 | 0.062972 | 0.00319007 | 0.000000017 | 461089 | 17.59651621 |
| rs11243202 | C | T | 0.0116378 | 0.486018 | 0.00149304 | 6.4998E-15 | 461089 | 31.20226982 |
| rs1125 | A | G | -0.0100304 | 0.336554 | 0.00157472 | 1.89998E-10 | 461089 | 20.71720253 |
| rs113835839 | T | C | -0.00986353 | 0.247871 | 0.00172486 | 1.09999E-08 | 461089 | 16.72681696 |
| rs113851275 | A | G | 0.0131425 | 0.107596 | 0.00239826 | 4.30002E-08 | 461089 | 15.2947636 |
| rs114924396 | G | A | -0.0191251 | 0.05363 | 0.00331785 | 8.19993E-09 | 461089 | 17.12013059 |
| rs116922558 | G | A | -0.0246271 | 0.039907 | 0.00386049 | 1.79999E-10 | 461089 | 21.43008401 |
| rs11998884 | T | C | 0.0173433 | 0.061825 | 0.0031243 | 2.80001E-08 | 461089 | 16.08945618 |
| rs12052508 | T | C | -0.0133517 | 0.879044 | 0.00227992 | 4.70002E-09 | 461089 | 17.48003841 |
| rs12316046 | G | A | -0.0162046 | 0.377959 | 0.00153212 | 3.80014E-26 | 461089 | 56.9388533 |
| rs12412806 | A | G | -0.00909582 | 0.294214 | 0.00164139 | 2.99999E-08 | 461089 | 15.8434504 |
| rs12522139 | G | T | -0.0114381 | 0.171144 | 0.00197332 | 6.80002E-09 | 461089 | 17.11509915 |
| rs12616285 | G | T | 0.0122195 | 0.148607 | 0.00209396 | 5.39995E-09 | 461089 | 17.42237593 |
| rs12763284 | G | A | 0.00959741 | 0.466048 | 0.00148928 | 1.2E-10 | 461089 | 21.13857122 |
| rs12790261 | A | C | -0.0263714 | 0.082377 | 0.00270734 | 1.99986E-22 | 461089 | 48.48384519 |
| rs12823922 | G | A | -0.0114203 | 0.222184 | 0.00178649 | 1.6E-10 | 461089 | 20.78638725 |
| rs12889267 | G | A | -0.0122874 | 0.167048 | 0.0019904 | 6.69993E-10 | 461089 | 19.37377507 |
| rs12899474 | T | C | -0.0148939 | 0.108065 | 0.00239936 | 5.39995E-10 | 461089 | 19.71825417 |
| rs12914702 | A | G | 0.0107788 | 0.300438 | 0.00169282 | 1.89998E-10 | 461089 | 22.51945459 |
| rs13106087 | C | T | 0.0129259 | 0.829827 | 0.001977 | 6.20012E-11 | 461089 | 21.75880555 |
| rs13107325 | T | C | -0.0275 | 0.074904 | 0.00282478 | 2.09991E-22 | 461089 | 48.33007594 |
| rs13146142 | C | T | -0.0207968 | 0.158627 | 0.00203165 | 1.39991E-24 | 461089 | 53.2382304 |
| rs13169333 | C | T | 0.00929083 | 0.260299 | 0.00169626 | 4.30002E-08 | 461089 | 15.32734477 |
| rs13355365 | T | C | -0.00846604 | 0.379543 | 0.00153398 | 3.40001E-08 | 461089 | 15.56548742 |
| rs143384 | G | A | 0.0230423 | 0.404392 | 0.00151366 | 2.49977E-52 | 461089 | 117.96158 |
| rs1442883 | A | C | -0.0106189 | 0.253067 | 0.00171426 | 5.80003E-10 | 461089 | 19.65664966 |
| rs1486925 | C | T | -0.0095288 | 0.314649 | 0.00160467 | 2.90001E-09 | 461089 | 18.05708301 |
| rs150330307 | C | T | -0.0325831 | 0.031875 | 0.00422401 | 1.20005E-14 | 461089 | 30.21409885 |
| rs1550115 | T | C | 0.0152836 | 0.748561 | 0.00171276 | 4.49987E-19 | 461089 | 40.54750257 |
| rs1556659 | T | C | 0.0175345 | 0.381531 | 0.00153689 | 3.80014E-30 | 461089 | 66.91327973 |
| rs1641457 | G | T | 0.0130726 | 0.223327 | 0.00178536 | 2.39994E-13 | 461089 | 27.3365617 |
| rs1840753 | T | C | 0.0176942 | 0.062797 | 0.00312088 | 1.40001E-08 | 461089 | 16.99280966 |
| rs1885690 | A | C | -0.00839964 | 0.410365 | 0.00151212 | 2.80001E-08 | 461089 | 15.7436164 |
| rs1952256 | G | A | 0.00976791 | 0.345023 | 0.00156323 | 4.09996E-10 | 461089 | 19.8843263 |
| rs2147461 | C | T | 0.0134299 | 0.117274 | 0.00231042 | 6.1E-09 | 461089 | 17.21885187 |
| rs2165241 | C | T | 0.0122486 | 0.508842 | 0.00148844 | 1.9002E-16 | 461089 | 34.57995343 |
| rs2194411 | A | G | 0.0142831 | 0.128444 | 0.00224795 | 2.1E-10 | 461089 | 21.06146937 |
| rs2194747 | G | A | 0.00985126 | 0.707014 | 0.00163925 | 1.89998E-09 | 461089 | 18.53918608 |
| rs2208562 | T | C | -0.0115616 | 0.609627 | 0.00152246 | 3.10027E-14 | 461089 | 29.33744135 |
| rs2226685 | C | T | 0.0103333 | 0.758696 | 0.00174324 | 3.09999E-09 | 461089 | 18.02777499 |
| rs2244621 | T | C | 0.0115957 | 0.144157 | 0.00211936 | 4.49997E-08 | 461089 | 15.2986443 |
| rs2273555 | A | G | 0.0110316 | 0.606106 | 0.00152155 | 4.19952E-13 | 461089 | 26.79445667 |
| rs2296316 | C | T | -0.00821333 | 0.464404 | 0.00150213 | 4.60002E-08 | 461089 | 15.47394872 |
| rs2322754 | A | G | -0.0117022 | 0.831641 | 0.00198538 | 3.79997E-09 | 461089 | 17.68229671 |
| rs2341184 | C | T | 0.0100606 | 0.271748 | 0.00167125 | 1.7E-09 | 461089 | 18.4725973 |
| rs2362972 | A | C | -0.00856859 | 0.577904 | 0.00150767 | 1.29999E-08 | 461089 | 16.5164222 |
| rs2389763 | C | T | -0.00832615 | 0.591848 | 0.00151353 | 3.79997E-08 | 461089 | 15.44364741 |
| rs2431112 | A | G | -0.011172 | 0.440644 | 0.00149737 | 8.60003E-14 | 461089 | 28.37131692 |
| rs246181 | T | C | 0.00970432 | 0.373429 | 0.00154856 | 3.69999E-10 | 461089 | 20.32087698 |
| rs248831 | A | G | 0.00988989 | 0.265259 | 0.00171686 | 8.40001E-09 | 461089 | 17.57999069 |
| rs2587505 | C | T | -0.0092717 | 0.419822 | 0.0015091 | 8.10009E-10 | 461089 | 19.30981603 |
| rs2631360 | A | G | -0.0111803 | 0.519189 | 0.00148648 | 5.40008E-14 | 461089 | 28.77720781 |
| rs2717351 | G | A | 0.0127695 | 0.211783 | 0.00183473 | 3.40017E-12 | 461089 | 25.10285277 |
| rs2854152 | G | A | 0.010991 | 0.678266 | 0.00159765 | 6.00067E-12 | 461089 | 24.31135006 |
| rs2894602 | G | A | 0.0101332 | 0.766101 | 0.00176778 | 9.90011E-09 | 461089 | 16.96830111 |
| rs3118914 | T | G | -0.0194408 | 0.215004 | 0.00180843 | 5.90065E-27 | 461089 | 58.83183779 |
| rs34030812 | C | T | -0.00912858 | 0.36737 | 0.00154266 | 3.29997E-09 | 461089 | 17.86041321 |
| rs34845616 | A | G | 0.00979506 | 0.245647 | 0.00173626 | 0.000000017 | 461089 | 16.3957198 |
| rs35304341 | A | G | -0.0142862 | 0.089496 | 0.00260278 | 0.00000004 | 461089 | 15.33727263 |
| rs35457492 | C | A | 0.00833889 | 0.495364 | 0.00149104 | 2.19999E-08 | 461089 | 16.03057192 |
| rs35701422 | C | T | -0.00869121 | 0.625757 | 0.00153481 | 0.000000015 | 461089 | 16.31360762 |
| rs35833641 | G | A | 0.00922306 | 0.312389 | 0.00160181 | 8.50002E-09 | 461089 | 16.85075037 |
| rs36065733 | G | T | 0.00971991 | 0.472588 | 0.00149596 | 8.19974E-11 | 461089 | 21.71662817 |
| rs3771498 | T | C | 0.0141605 | 0.514178 | 0.00148856 | 1.9002E-21 | 461089 | 46.19618497 |
| rs3848369 | T | C | -0.00953776 | 0.38657 | 0.00153126 | 4.70002E-10 | 461089 | 19.89387723 |
| rs4121165 | A | G | -0.0119792 | 0.211455 | 0.00182142 | 4.79954E-11 | 461089 | 22.06660971 |
| rs4369779 | C | T | 0.017203 | 0.789015 | 0.00182068 | 3.40017E-21 | 461089 | 45.43628025 |
| rs4549685 | T | C | 0.00971494 | 0.329917 | 0.00158124 | 8.10009E-10 | 461089 | 19.24183209 |
| rs4553566 | C | T | -0.00930181 | 0.453271 | 0.00149229 | 4.60002E-10 | 461089 | 19.77417418 |
| rs4730984 | T | G | 0.0104789 | 0.239566 | 0.00174245 | 1.79999E-09 | 461089 | 18.44804005 |
| rs4737446 | T | G | 0.0102668 | 0.694661 | 0.00162131 | 2.39999E-10 | 461089 | 20.61861917 |
| rs4751671 | A | G | 0.0082332 | 0.530724 | 0.00150019 | 4.09996E-08 | 461089 | 15.5691113 |
| rs4752689 | A | G | 0.0087531 | 0.584246 | 0.00150761 | 6.4E-09 | 461089 | 17.1627504 |
| rs4768725 | C | T | 0.00905894 | 0.699597 | 0.00162081 | 2.30001E-08 | 461089 | 15.90511114 |
| rs4784329 | C | A | -0.0133357 | 0.426476 | 0.00150734 | 8.99912E-19 | 461089 | 40.11717732 |
| rs4785574 | G | A | -0.0103769 | 0.555329 | 0.00149954 | 4.49987E-12 | 461089 | 24.52236078 |
| rs4793658 | C | A | -0.0136707 | 0.110375 | 0.00248614 | 3.79997E-08 | 461089 | 16.9234888 |
| rs4927015 | A | G | 0.013059 | 0.582858 | 0.00150895 | 5.00035E-18 | 461089 | 38.23994844 |
| rs56074046 | A | G | -0.00903502 | 0.371748 | 0.00153954 | 4.39997E-09 | 461089 | 17.58215379 |
| rs56144131 | C | T | -0.01307 | 0.149344 | 0.00208666 | 3.79997E-10 | 461089 | 20.01366064 |
| rs56365901 | G | A | -0.0142618 | 0.222684 | 0.00179293 | 1.80011E-15 | 461089 | 32.46987702 |
| rs58670122 | G | A | -0.0132234 | 0.14316 | 0.00214787 | 7.39997E-10 | 461089 | 19.78067379 |
| rs600038 | C | T | -0.0103761 | 0.20706 | 0.00183358 | 0.000000015 | 461089 | 16.30177688 |
| rs6006984 | C | T | 0.0102987 | 0.277766 | 0.00165665 | 5.1E-10 | 461089 | 19.622533 |
| rs61389091 | T | C | 0.0220553 | 0.041752 | 0.00373782 | 3.59998E-09 | 461089 | 17.94786549 |
| rs62037412 | A | G | 0.00932966 | 0.357285 | 0.0015542 | 1.89998E-09 | 461089 | 18.43304028 |
| rs62234790 | A | C | 0.0105846 | 0.245816 | 0.0017265 | 8.79995E-10 | 461089 | 19.15442683 |
| rs62509875 | G | A | -0.0131798 | 0.170951 | 0.00197325 | 2.39994E-11 | 461089 | 22.70416984 |
| rs635538 | A | G | -0.0219943 | 0.913868 | 0.00266274 | 1.50003E-16 | 461089 | 35.11689615 |
| rs645144 | C | T | -0.00868793 | 0.329996 | 0.00158627 | 4.30002E-08 | 461089 | 15.39033065 |
| rs6473015 | C | A | 0.00959961 | 0.285659 | 0.00164629 | 5.49997E-09 | 461089 | 17.34170359 |
| rs6693567 | T | C | -0.00974656 | 0.733032 | 0.00167765 | 6.29999E-09 | 461089 | 17.1441425 |
| rs6693965 | T | G | -0.016251 | 0.12803 | 0.00223033 | 3.19963E-13 | 461089 | 27.19028978 |
| rs6711390 | T | C | 0.0132663 | 0.37107 | 0.00152876 | 4.00037E-18 | 461089 | 37.87984715 |
| rs6715064 | T | C | -0.00921128 | 0.310405 | 0.00160563 | 9.59997E-09 | 461089 | 16.74917086 |
| rs6792762 | A | G | -0.00911683 | 0.419501 | 0.0015155 | 1.79999E-09 | 461089 | 18.66614039 |
| rs6882168 | T | C | -0.00909312 | 0.337386 | 0.00157605 | 7.90005E-09 | 461089 | 17.04685719 |
| rs6962338 | G | A | -0.0203488 | 0.043971 | 0.00362338 | 0.00000002 | 461089 | 16.05258182 |
| rs6977081 | T | G | 0.01286 | 0.333818 | 0.00158867 | 5.70033E-16 | 461089 | 33.91808195 |
| rs7034200 | A | C | 0.00868874 | 0.480149 | 0.00148875 | 5.30005E-09 | 461089 | 17.37799392 |
| rs7148603 | A | G | 0.00930613 | 0.359456 | 0.00158837 | 4.70002E-09 | 461089 | 18.38929214 |
| rs7196917 | G | A | -0.010582 | 0.429932 | 0.00150287 | 1.9002E-12 | 461089 | 25.31048952 |
| rs7206195 | T | C | -0.0153211 | 0.180373 | 0.00193924 | 2.80027E-15 | 461089 | 32.00461302 |
| rs721101 | C | T | 0.00946697 | 0.271238 | 0.0016742 | 0.000000016 | 461089 | 16.33760529 |
| rs7214252 | A | G | -0.0102442 | 0.211101 | 0.00182532 | 0.00000002 | 461089 | 16.11750195 |
| rs7249 | T | C | 0.00848186 | 0.365956 | 0.00154442 | 0.00000004 | 461089 | 15.39429219 |
| rs7266065 | A | G | 0.00993881 | 0.322982 | 0.00159481 | 4.60002E-10 | 461089 | 19.91960996 |
| rs7301953 | A | G | -0.0115397 | 0.312268 | 0.00160449 | 6.4003E-13 | 461089 | 26.37396036 |
| rs7451021 | C | T | -0.0157967 | 0.689474 | 0.00160573 | 7.70016E-23 | 461089 | 49.27308654 |
| rs75457267 | T | C | -0.0187295 | 0.05122 | 0.00339456 | 3.40001E-08 | 461089 | 15.72124832 |
| rs7549184 | A | G | 0.01056 | 0.787331 | 0.00181367 | 5.80003E-09 | 461089 | 17.2194927 |
| rs7565148 | G | T | -0.0103511 | 0.500863 | 0.00148921 | 3.59998E-12 | 461089 | 24.70300279 |
| rs7576964 | T | G | 0.00974539 | 0.342052 | 0.00156908 | 5.30005E-10 | 461089 | 19.71130943 |
| rs7657558 | G | T | 0.0107255 | 0.719597 | 0.00166228 | 1.09999E-10 | 461089 | 21.40632001 |
| rs76749769 | T | C | 0.0144315 | 0.091199 | 0.00257957 | 2.19999E-08 | 461089 | 15.91884561 |
| rs76895963 | G | T | 0.0359771 | 0.020696 | 0.00575693 | 4.09996E-10 | 461089 | 24.19322669 |
| rs77485342 | T | C | 0.0353373 | 0.018008 | 0.0055898 | 2.59998E-10 | 461089 | 20.36451618 |
| rs7790322 | T | C | -0.00860301 | 0.415619 | 0.0015092 | 0.000000012 | 461089 | 16.57764011 |
| rs7871404 | G | A | 0.0119345 | 0.188654 | 0.00190074 | 3.40001E-10 | 461089 | 20.1054718 |
| rs7963801 | C | T | -0.0112734 | 0.571983 | 0.00151048 | 8.4004E-14 | 461089 | 28.69430807 |
| rs79723785 | C | T | -0.0340504 | 0.016495 | 0.00602877 | 0.000000016 | 461089 | 17.34620295 |
| rs8055199 | A | G | -0.00896262 | 0.660123 | 0.00157271 | 0.000000012 | 461089 | 16.62061232 |
| rs823130 | T | C | -0.0123872 | 0.432873 | 0.00150332 | 1.69981E-16 | 461089 | 34.74038273 |
| rs852520 | A | C | -0.00890306 | 0.662481 | 0.00157301 | 0.000000015 | 461089 | 16.3448299 |
| rs911642 | T | C | 0.00862996 | 0.375746 | 0.00153783 | 0.00000002 | 461089 | 16.110284 |
| rs9267806 | A | G | -0.0167434 | 0.255832 | 0.00170197 | 7.70016E-23 | 461089 | 49.22370284 |
| rs9322822 | T | C | 0.0110799 | 0.320183 | 0.00159266 | 3.50026E-12 | 461089 | 24.64336103 |
| rs935728 | T | C | 0.00955337 | 0.327604 | 0.0015872 | 1.79999E-09 | 461089 | 18.54042705 |
| rs9388051 | A | G | 0.0106262 | 0.186051 | 0.0019116 | 2.69998E-08 | 461089 | 15.769386 |
| rs9396861 | A | C | -0.00962972 | 0.598901 | 0.00155347 | 5.69994E-10 | 461089 | 20.54319756 |
| rs9652468 | A | G | -0.0125308 | 0.249359 | 0.00172118 | 3.29989E-13 | 461089 | 27.10536208 |
| rs9757079 | T | C | 0.00980223 | 0.318301 | 0.00159699 | 8.40001E-10 | 461089 | 19.22707869 |
| rs9853018 | T | C | 0.0101977 | 0.443249 | 0.00149426 | 8.80035E-12 | 461089 | 23.66738536 |

**Abbreviations:** SNPs, single-nucleotide polymorphisms.

**Table S3** 128 index SNPs represented genetically predicted left-hand grip strength

| **SNP** | **effect_allele** | **other_allele** | **beta** | **eaf** | **se** | **p value** | **sample size** | **F value** |
| --- | --- | --- | --- | --- | --- | --- | --- | --- |
| rs10097417 | G | A | -0.0132302 | 0.170904 | 0.00197055 | 1.9E-11 | 461026 | 22.87003472 |
| rs10176878 | C | T | -0.0129478 | 0.190861 | 0.0018962 | 8.6E-12 | 461026 | 23.87317583 |
| rs10403906 | A | G | -0.0100323 | 0.476375 | 0.00148665 | 1.5E-11 | 461026 | 23.14981781 |
| rs1044299 | T | C | 0.01401 | 0.546046 | 0.00149362 | 6.6E-21 | 461026 | 44.86575953 |
| rs10786706 | T | C | 0.0100072 | 0.465745 | 0.00148741 | 1.7E-11 | 461026 | 22.97730104 |
| rs10821939 | A | G | -0.00935422 | 0.573342 | 0.00150339 | 4.9E-10 | 461026 | 19.73707613 |
| rs10831903 | T | C | 0.00928662 | 0.423383 | 0.00151154 | 8.1E-10 | 461026 | 19.41377134 |
| rs10846071 | T | C | -0.016641 | 0.393672 | 0.00151685 | 5.3E-28 | 461026 | 60.95562993 |
| rs10934857 | A | G | 0.00928675 | 0.258913 | 0.00170182 | 0.000000048 | 461026 | 15.25879888 |
| rs10988217 | G | A | -0.00920657 | 0.603742 | 0.00152911 | 1.7E-09 | 461026 | 18.69813019 |
| rs11002322 | T | G | -0.00998924 | 0.340459 | 0.00157255 | 2.1E-10 | 461026 | 20.66076458 |
| rs11003014 | G | A | 0.011433 | 0.161184 | 0.00202143 | 0.000000016 | 461026 | 16.29595463 |
| rs11076004 | A | G | -0.0115356 | 0.418177 | 0.00150909 | 2.1E-14 | 461026 | 29.85485332 |
| rs11111267 | G | A | 0.0108359 | 0.18106 | 0.00192886 | 0.000000019 | 461026 | 16.05369893 |
| rs11121542 | A | G | -0.0157601 | 0.122677 | 0.00225916 | 3E-12 | 461026 | 24.65013114 |
| rs11125803 | T | C | 0.0142851 | 0.740516 | 0.00169673 | 3.8E-17 | 461026 | 36.1577231 |
| rs11168357 | A | G | -0.00962864 | 0.246008 | 0.00172661 | 0.000000025 | 461026 | 15.85682446 |
| rs11204664 | C | T | -0.00865184 | 0.578725 | 0.00150032 | 8.1E-09 | 461026 | 16.82775404 |
| rs11243202 | C | T | 0.00972237 | 0.486019 | 0.0014909 | 7E-11 | 461026 | 21.773113 |
| rs112485536 | T | C | 0.0161779 | 0.075507 | 0.00281803 | 9.4E-09 | 461026 | 16.84637327 |
| rs113434679 | A | C | -0.0149156 | 0.199577 | 0.00187618 | 1.9E-15 | 461026 | 32.77161095 |
| rs113918482 | G | A | -0.0101011 | 0.222507 | 0.00178515 | 0.000000015 | 461026 | 16.27602144 |
| rs116409670 | T | C | -0.0152418 | 0.079819 | 0.00273867 | 0.000000026 | 461026 | 15.73338958 |
| rs116922558 | G | A | -0.0215842 | 0.039916 | 0.00385425 | 0.000000021 | 461026 | 16.46262483 |
| rs12316046 | G | A | -0.0174165 | 0.37795 | 0.00152991 | 5E-30 | 461026 | 65.76559815 |
| rs12473732 | T | C | 0.0109869 | 0.486507 | 0.00148601 | 1.4E-13 | 461026 | 27.80709192 |
| rs12528131 | G | A | -0.00882788 | 0.488343 | 0.00148565 | 2.8E-09 | 461026 | 17.9551508 |
| rs12533765 | G | A | -0.0092 | 0.280054 | 0.00165199 | 0.000000026 | 461026 | 15.73575536 |
| rs12673062 | A | G | -0.0107691 | 0.215756 | 0.00180808 | 2.6E-09 | 461026 | 18.09444911 |
| rs12790261 | A | C | -0.0251882 | 0.082383 | 0.00270305 | 1.2E-20 | 461026 | 44.2272967 |
| rs12889267 | G | A | -0.0137394 | 0.167084 | 0.00198726 | 4.7E-12 | 461026 | 24.22422194 |
| rs12906830 | C | T | 0.0108401 | 0.601065 | 0.00151797 | 9.3E-13 | 461026 | 25.98184849 |
| rs12914702 | A | G | 0.0109514 | 0.300395 | 0.00169071 | 9.3E-11 | 461026 | 23.2413952 |
| rs13091492 | G | A | -0.00847903 | 0.372833 | 0.00153407 | 0.000000033 | 461026 | 15.5010067 |
| rs13106087 | C | T | 0.0116202 | 0.829801 | 0.00197399 | 3.9E-09 | 461026 | 17.5845048 |
| rs13107325 | T | C | -0.0261553 | 0.074908 | 0.0028208 | 1.8E-20 | 461026 | 43.71486393 |
| rs13146142 | C | T | -0.0202031 | 0.158623 | 0.00202888 | 2.3E-23 | 461026 | 50.23374479 |
| rs13227429 | C | T | -0.00858767 | 0.561343 | 0.0014977 | 9.8E-09 | 461026 | 16.74461852 |
| rs13337177 | T | G | -0.0142799 | 0.180836 | 0.00193621 | 1.6E-13 | 461026 | 27.85401049 |
| rs143002906 | T | C | 0.0262281 | 0.027829 | 0.00457421 | 9.8E-09 | 461026 | 17.16111511 |
| rs143384 | G | A | 0.0209202 | 0.404388 | 0.00151159 | 1.5E-43 | 461026 | 97.21658186 |
| rs1434095 | C | T | 0.0140301 | 0.875121 | 0.00225906 | 5.3E-10 | 461026 | 19.83595665 |
| rs1486925 | C | T | -0.0104734 | 0.314604 | 0.00160211 | 6.3E-11 | 461026 | 21.81007433 |
| rs150330307 | C | T | -0.0307753 | 0.031896 | 0.0042167 | 2.9E-13 | 461026 | 26.96768365 |
| rs1551042 | C | A | -0.0111279 | 0.647025 | 0.00155167 | 7.4E-13 | 461026 | 26.07782797 |
| rs1556659 | T | C | 0.0162896 | 0.38153 | 0.00153452 | 2.5E-26 | 461026 | 57.74015881 |
| rs1641457 | G | T | 0.0120456 | 0.223305 | 0.0017829 | 1.4E-11 | 461026 | 23.20508186 |
| rs16870531 | T | C | 0.011198 | 0.238492 | 0.00174241 | 1.3E-10 | 461026 | 20.99928015 |
| rs17282763 | C | T | 0.00893956 | 0.296281 | 0.00163298 | 0.000000044 | 461026 | 15.36403377 |
| rs17466480 | G | A | -0.0118235 | 0.386968 | 0.00152732 | 9.8E-15 | 461026 | 30.57979216 |
| rs17630248 | C | T | -0.009184 | 0.347808 | 0.00156162 | 4.1E-09 | 461026 | 17.64212186 |
| rs181766 | C | T | 0.00963247 | 0.321793 | 0.00160372 | 1.9E-09 | 461026 | 18.67184329 |
| rs1884447 | A | G | 0.00846069 | 0.400566 | 0.00151391 | 0.000000023 | 461026 | 15.84883579 |
| rs1981612 | A | C | 0.00922755 | 0.45601 | 0.00151053 | 0.000000001 | 461026 | 19.47654229 |
| rs2038760 | T | C | -0.0115262 | 0.170908 | 0.00198662 | 6.6E-09 | 461026 | 17.35837972 |
| rs217181 | T | C | 0.0119554 | 0.193087 | 0.00188145 | 2.1E-10 | 461026 | 20.53443355 |
| rs2359239 | T | C | -0.00881461 | 0.391621 | 0.00152153 | 6.9E-09 | 461026 | 17.06938539 |
| rs2431112 | A | G | -0.00958496 | 0.440641 | 0.00149514 | 1.4E-10 | 461026 | 20.88003523 |
| rs2532111 | G | A | 0.0102852 | 0.639542 | 0.00155794 | 4.1E-11 | 461026 | 22.48670478 |
| rs2587505 | C | T | -0.00900424 | 0.419871 | 0.00150694 | 2.3E-09 | 461026 | 18.20988268 |
| rs2631360 | A | G | -0.0109177 | 0.519209 | 0.00148434 | 1.9E-13 | 461026 | 27.4373469 |
| rs2789514 | A | G | 0.0120546 | 0.867941 | 0.00220932 | 0.000000049 | 461026 | 15.35796586 |
| rs2800789 | C | A | 0.00826025 | 0.480339 | 0.00149261 | 0.000000031 | 461026 | 15.70451633 |
| rs2850379 | A | C | -0.00828995 | 0.432305 | 0.00150007 | 0.000000033 | 461026 | 15.55174813 |
| rs28542042 | T | C | 0.0110101 | 0.308877 | 0.00162277 | 1.2E-11 | 461026 | 23.86169748 |
| rs2871960 | C | A | 0.0120879 | 0.444681 | 0.00149222 | 5.5E-16 | 461026 | 33.2720515 |
| rs2974438 | A | G | -0.0100735 | 0.211026 | 0.00182387 | 0.000000033 | 461026 | 15.57863957 |
| rs3118903 | A | G | -0.0174477 | 0.219552 | 0.00179692 | 2.7E-22 | 461026 | 48.10148281 |
| rs34030812 | C | T | -0.0101679 | 0.367365 | 0.00154042 | 4.1E-11 | 461026 | 22.15592112 |
| rs34722008 | A | G | 0.00858569 | 0.353332 | 0.00155452 | 0.000000033 | 461026 | 15.53047695 |
| rs34845616 | A | G | 0.0108395 | 0.245653 | 0.00173373 | 4E-10 | 461026 | 20.07641042 |
| rs35236379 | T | G | 0.0123565 | 0.142324 | 0.00212204 | 5.8E-09 | 461026 | 17.1855703 |
| rs3814877 | T | G | 0.0105385 | 0.401594 | 0.00151385 | 3.4E-12 | 461026 | 24.61043849 |
| rs3819121 | C | T | 0.0140963 | 0.368945 | 0.00152872 | 2.9E-20 | 461026 | 42.66136127 |
| rs4121165 | A | G | -0.0114169 | 0.211447 | 0.00181868 | 3.4E-10 | 461026 | 20.04024849 |
| rs41271299 | T | C | 0.0211891 | 0.051241 | 0.00336402 | 3E-10 | 461026 | 20.12671514 |
| rs4308051 | G | T | 0.0159929 | 0.789105 | 0.00181863 | 1.4E-18 | 461026 | 39.25074547 |
| rs4335354 | A | C | -0.00939409 | 0.315536 | 0.00160262 | 4.6E-09 | 461026 | 17.57441709 |
| rs4498020 | A | C | -0.0104238 | 0.723767 | 0.00166995 | 4.3E-10 | 461026 | 20.03091375 |
| rs4621706 | T | C | -0.0117068 | 0.544473 | 0.00150003 | 6E-15 | 461026 | 31.34381168 |
| rs4677601 | G | A | 0.00905884 | 0.510324 | 0.001485 | 1.1E-09 | 461026 | 18.90920268 |
| rs4713506 | A | G | -0.0157268 | 0.255607 | 0.00169811 | 2E-20 | 461026 | 43.39623413 |
| rs4737446 | T | G | 0.0104178 | 0.694626 | 0.00161882 | 1.2E-10 | 461026 | 21.22807117 |
| rs4739739 | G | A | -0.00853387 | 0.415057 | 0.00150466 | 0.000000014 | 461026 | 16.30362241 |
| rs4930236 | A | C | 0.0119032 | 0.835892 | 0.00202069 | 3.8E-09 | 461026 | 17.92171965 |
| rs55681913 | C | T | 0.0137738 | 0.106095 | 0.00243658 | 0.000000016 | 461026 | 16.59070616 |
| rs56338231 | G | A | -0.010847 | 0.258266 | 0.00169739 | 1.7E-10 | 461026 | 20.78306975 |
| rs58670122 | G | A | -0.0118148 | 0.143159 | 0.00214462 | 0.000000036 | 461026 | 15.78853852 |
| rs59116179 | T | C | 0.00857385 | 0.617442 | 0.00153635 | 0.000000024 | 461026 | 16.0108989 |
| rs6006984 | C | T | 0.00984917 | 0.277764 | 0.00165413 | 2.6E-09 | 461026 | 17.94430634 |
| rs61286123 | C | T | -0.0101041 | 0.227916 | 0.00177111 | 0.000000012 | 461026 | 16.56554228 |
| rs61389091 | T | C | 0.0261627 | 0.04174 | 0.00373295 | 2.4E-12 | 461026 | 25.24527596 |
| rs61818100 | C | T | 0.0134422 | 0.116595 | 0.00231335 | 6.2E-09 | 461026 | 17.16137437 |
| rs62081464 | T | C | -0.0098827 | 0.227338 | 0.00177979 | 0.000000028 | 461026 | 15.81914945 |
| rs62253653 | G | A | 0.0106985 | 0.295379 | 0.00163146 | 5.5E-11 | 461026 | 21.96630891 |
| rs635538 | A | G | -0.0216569 | 0.913853 | 0.00265852 | 3.8E-16 | 461026 | 34.04838911 |
| rs6680160 | G | A | 0.0100686 | 0.628066 | 0.00153878 | 6E-11 | 461026 | 21.83661536 |
| rs6802071 | T | C | -0.00940386 | 0.434928 | 0.00150182 | 3.8E-10 | 461026 | 20.04046332 |
| rs6882168 | T | C | -0.00935387 | 0.337417 | 0.00157364 | 2.8E-09 | 461026 | 18.03691727 |
| rs6962338 | G | A | -0.0214095 | 0.043993 | 0.0036171 | 3.2E-09 | 461026 | 17.77582883 |
| rs6977081 | T | G | 0.0147525 | 0.333835 | 0.00158641 | 1.4E-20 | 461026 | 44.63159227 |
| rs7026798 | C | T | 0.00823598 | 0.43232 | 0.00150641 | 0.000000046 | 461026 | 15.35003471 |
| rs7124681 | A | C | -0.0116557 | 0.408355 | 0.00150615 | 1E-14 | 461026 | 30.26632718 |
| rs7148603 | A | G | 0.00957206 | 0.359427 | 0.00158612 | 1.6E-09 | 461026 | 19.45198337 |
| rs7176095 | G | A | -0.013375 | 0.128192 | 0.00222025 | 1.7E-09 | 461026 | 18.43495724 |
| rs7196917 | G | A | -0.0117302 | 0.429948 | 0.00150067 | 5.4E-15 | 461026 | 31.09753378 |
| rs7197751 | T | G | -0.00946321 | 0.363019 | 0.00156268 | 1.4E-09 | 461026 | 19.09440768 |
| rs723588 | C | T | 0.0127904 | 0.142598 | 0.00211948 | 1.6E-09 | 461026 | 18.44331431 |
| rs73307079 | C | T | 0.0111025 | 0.211119 | 0.00183407 | 1.4E-09 | 461026 | 18.93013131 |
| rs7516571 | G | A | 0.00937798 | 0.259017 | 0.00169361 | 0.000000031 | 461026 | 15.56414232 |
| rs75497896 | C | T | -0.0206727 | 0.051006 | 0.00337524 | 9.1E-10 | 461026 | 19.07447177 |
| rs755547 | A | G | 0.0165156 | 0.188906 | 0.00189766 | 3.2E-18 | 461026 | 38.5387274 |
| rs7571789 | C | T | 0.0129539 | 0.522782 | 0.001487 | 3E-18 | 461026 | 38.60382165 |
| rs772014 | G | A | -0.0106178 | 0.392538 | 0.00151891 | 2.7E-12 | 461026 | 24.78840978 |
| rs77485342 | T | C | 0.0329675 | 0.018003 | 0.00558187 | 3.5E-09 | 461026 | 17.71736679 |
| rs7856625 | T | C | -0.0111297 | 0.609861 | 0.0015209 | 2.5E-13 | 461026 | 27.17679001 |
| rs7963801 | C | T | -0.0104348 | 0.571927 | 0.00150824 | 4.6E-12 | 461026 | 24.58132362 |
| rs7970350 | T | C | -0.0101345 | 0.494068 | 0.00148418 | 8.6E-12 | 461026 | 23.67343312 |
| rs8108461 | C | T | 0.00952393 | 0.572775 | 0.0015066 | 2.6E-10 | 461026 | 20.46669868 |
| rs821100 | G | A | -0.0101977 | 0.265512 | 0.00168615 | 1.5E-09 | 461026 | 18.70020432 |
| rs823130 | T | C | -0.0113317 | 0.432903 | 0.00150098 | 4.4E-14 | 461026 | 29.0683833 |
| rs9371201 | T | C | -0.00933847 | 0.335102 | 0.0015738 | 0.000000003 | 461026 | 17.91660809 |
| rs9371881 | A | G | 0.00947946 | 0.359174 | 0.00154996 | 9.6E-10 | 461026 | 19.07153246 |
| rs9388769 | A | G | -0.0140821 | 0.67318 | 0.00158065 | 5.1E-19 | 461026 | 40.23166347 |
| rs9611273 | T | C | 0.0107888 | 0.25267 | 0.00173048 | 4.5E-10 | 461026 | 20.26687958 |
| rs9866627 | A | C | -0.0155989 | 0.084376 | 0.00267761 | 5.7E-09 | 461026 | 17.33388023 |
| rs9944324 | G | A | -0.00855272 | 0.456723 | 0.00150169 | 0.000000012 | 461026 | 16.73608566 |
| rs999493 | A | G | 0.0128713 | 0.621921 | 0.00153936 | 6.2E-17 | 461026 | 35.92128418 |

**Abbreviations:** SNPs, single-nucleotide polymorphisms.

**Table S4** 50 index SNPs represented genetically predicted usual walking pace

| **SNP** | **effect_allele** | **other_allele** | **beta** | **eaf** | **se** | **p value** | **sample size** | **F value** |
| --- | --- | --- | --- | --- | --- | --- | --- | --- |
| rs10750025 | T | C | -0.0083554 | 0.681757 | 0.00136528 | 9.40005E-10 | 459915 | 13.93296941 |
| rs10828258 | G | A | -0.00932641 | 0.319319 | 0.00135882 | 6.70039E-12 | 459915 | 17.39087316 |
| rs10862220 | G | T | 0.00840767 | 0.674897 | 0.00135051 | 4.79999E-10 | 459915 | 14.26693988 |
| rs10883618 | A | G | 0.0078103 | 0.372248 | 0.00130834 | 2.39999E-09 | 459915 | 13.11220895 |
| rs11039324 | A | G | -0.0102105 | 0.403963 | 0.00128765 | 2.19989E-15 | 459915 | 23.09075865 |
| rs11077815 | C | T | -0.00713336 | 0.623657 | 0.00130691 | 4.79999E-08 | 459915 | 10.98590583 |
| rs11150623 | T | G | -0.00968813 | 0.644857 | 0.0013224 | 2.39994E-13 | 459915 | 19.77301218 |
| rs11152989 | T | C | -0.00751226 | 0.312264 | 0.00136699 | 3.89996E-08 | 459915 | 11.14815491 |
| rs113825410 | G | A | -0.00881182 | 0.224386 | 0.00151778 | 6.4E-09 | 459915 | 12.43059562 |
| rs11548200 | C | T | -0.016041 | 0.066034 | 0.00255177 | 3.29997E-10 | 459915 | 14.59764856 |
| rs11682482 | G | T | 0.00801894 | 0.680801 | 0.00135595 | 3.29997E-09 | 459915 | 12.8539126 |
| rs11732213 | C | T | 0.0091614 | 0.195605 | 0.00159593 | 9.40005E-09 | 459915 | 12.14764372 |
| rs11761141 | G | T | -0.00789936 | 0.325697 | 0.00135132 | 0.000000005 | 459915 | 12.60585004 |
| rs11848096 | C | T | -0.00750831 | 0.386669 | 0.00130696 | 9.20005E-09 | 459915 | 12.29809503 |
| rs12042959 | G | A | 0.0125663 | 0.14387 | 0.00181269 | 4.10015E-12 | 459915 | 17.89160374 |
| rs12461902 | A | G | -0.00801134 | 0.329608 | 0.00135739 | 3.59998E-09 | 459915 | 13.04538145 |
| rs12883788 | T | C | -0.00779959 | 0.459747 | 0.00127443 | 9.40005E-10 | 459915 | 13.89889689 |
| rs13107325 | T | C | -0.0242429 | 0.07488 | 0.00240623 | 7.10068E-24 | 459915 | 37.45208324 |
| rs144333966 | G | A | 0.0304614 | 0.014646 | 0.00544615 | 2.19999E-08 | 459915 | 12.31771734 |
| rs1592 | C | A | 0.0074513 | 0.395455 | 0.00128817 | 7.29995E-09 | 459915 | 12.20980989 |
| rs2037735 | T | C | -0.0112677 | 0.120628 | 0.00194308 | 6.69993E-09 | 459915 | 12.38826764 |
| rs205262 | G | A | -0.00870949 | 0.26893 | 0.00142654 | 0.000000001 | 459915 | 13.71842294 |
| rs2170670 | A | G | -0.00708769 | 0.606925 | 0.0012972 | 4.70002E-08 | 459915 | 11.02396582 |
| rs2280406 | A | G | -0.00996145 | 0.506176 | 0.00126505 | 3.40017E-15 | 459915 | 22.81644487 |
| rs2297600 | G | T | -0.0115607 | 0.17194 | 0.00168167 | 6.20012E-12 | 459915 | 17.50374951 |
| rs2439823 | G | A | -0.0072789 | 0.545578 | 0.00127453 | 1.09999E-08 | 459915 | 12.08277486 |
| rs2602731 | G | A | -0.00766675 | 0.681058 | 0.00136907 | 0.000000021 | 459915 | 11.74456878 |
| rs2645979 | A | G | 0.00861798 | 0.357204 | 0.00132024 | 6.70039E-11 | 459915 | 15.68638338 |
| rs273512 | T | C | -0.00966507 | 0.405352 | 0.00129058 | 6.89922E-14 | 459915 | 20.712352 |
| rs28519617 | G | T | -0.00812933 | 0.269813 | 0.0014336 | 1.40001E-08 | 459915 | 11.9763741 |
| rs35711462 | G | A | -0.0071659 | 0.511213 | 0.00126947 | 0.000000017 | 459915 | 11.80271003 |
| rs4109292 | A | G | 0.00735336 | 0.493943 | 0.00126787 | 6.59994E-09 | 459915 | 12.43275107 |
| rs4516268 | A | C | 0.00983008 | 0.193704 | 0.00160664 | 9.49992E-10 | 459915 | 13.88250625 |
| rs4643373 | C | T | 0.0077266 | 0.299973 | 0.00138223 | 2.30001E-08 | 459915 | 11.53167187 |
| rs4715208 | G | A | -0.0083844 | 0.752863 | 0.00146572 | 1.09999E-08 | 459915 | 12.03141297 |
| rs4839898 | A | G | 0.0130564 | 0.109786 | 0.00206037 | 2.30001E-10 | 459915 | 15.32534701 |
| rs55680124 | T | C | -0.010742 | 0.154913 | 0.00174984 | 8.30004E-10 | 459915 | 13.89569499 |
| rs57800857 | C | A | 0.00867607 | 0.36486 | 0.00132214 | 5.30029E-11 | 459915 | 16.04591675 |
| rs613872 | T | G | -0.0147074 | 0.825829 | 0.00167052 | 1.29987E-18 | 459915 | 28.62018114 |
| rs62048402 | A | G | -0.00987537 | 0.403579 | 0.00129011 | 1.9002E-14 | 459915 | 21.5931598 |
| rs6763292 | G | A | 0.00958833 | 0.780939 | 0.00153076 | 3.79997E-10 | 459915 | 14.46736219 |
| rs7789719 | C | T | 0.00854199 | 0.782126 | 0.00153719 | 2.69998E-08 | 459915 | 11.43717107 |
| rs7896518 | G | A | 0.00999095 | 0.427878 | 0.00129269 | 1.10002E-14 | 459915 | 22.47765345 |
| rs8010773 | C | T | -0.00816754 | 0.38208 | 0.00130079 | 3.40001E-10 | 459915 | 14.48739653 |
| rs8011870 | A | G | -0.00782739 | 0.288257 | 0.00140635 | 2.59998E-08 | 459915 | 11.56259999 |
| rs819167 | G | A | -0.0157993 | 0.936466 | 0.00259282 | 1.09999E-09 | 459915 | 13.66137379 |
| rs830627 | A | G | 0.00742054 | 0.417471 | 0.00128505 | 7.69999E-09 | 459915 | 12.31782657 |
| rs891387 | C | T | 0.00786028 | 0.49494 | 0.00126616 | 5.39995E-10 | 459915 | 14.20667832 |
| rs9366651 | T | G | 0.00948542 | 0.507037 | 0.00127132 | 8.60003E-14 | 459915 | 20.68684265 |
| rs9783304 | T | G | 0.00763598 | 0.689164 | 0.00136834 | 2.39999E-08 | 459915 | 11.48951981 |

**Abbreviations:** SNPs, single-nucleotide polymorphisms.

**Table S5** Nine index SNPs of GDM on genetic prediction of ALM

| **SNP** | **effect_allele** | **other_allele** | **beta** | **se** | **p value** |
| --- | --- | --- | --- | --- | --- |
| rs117195181 | G | T | 0.215808 | 0.0379065 | 1.25E-08 |
| rs13266634 | C | T | -0.0762399 | 0.012855 | 3.02E-09 |
| rs1402837 | C | T | 0.0974966 | 0.0162506 | 1.98E-09 |
| rs1574285 | G | T | -0.0710024 | 0.0124482 | 1.17E-08 |
| rs28624681 | C | T | -0.0777647 | 0.0137966 | 1.74E-08 |
| rs34872471 | T | C | 0.163438 | 0.01512 | 3.11E-27 |
| rs76349839 | A | C | -0.208294 | 0.0360235 | 7.38E-09 |
| rs7766070 | C | A | 0.0992973 | 0.0129991 | 2.19E-14 |
| rs7953129 | T | G | 0.0755861 | 0.0130243 | 6.5E-09 |

Abbreviations: ALM, Appendicular lean mass; GDM, gestational diabetes mellitus; SNPs, single-nucleotide polymorphisms.

**Table S6** Eight index SNPs of GDM on genetic prediction of right-hand grip strength

| **SNP** | **effect_allele** | **other_allele** | **beta** | **se** | **p value** |
| --- | --- | --- | --- | --- | --- |
| rs117195181 | G | T | 0.215808 | 0.0379065 | 1.25E-08 |
| rs13266634 | C | T | -0.0762399 | 0.012855 | 3.02E-09 |
| rs1402837 | C | T | 0.0974966 | 0.0162506 | 1.98E-09 |
| rs28624681 | C | T | -0.0777647 | 0.0137966 | 1.74E-08 |
| rs76349839 | A | C | -0.208294 | 0.0360235 | 7.38E-09 |
| rs7766070 | C | A | 0.0992973 | 0.0129991 | 2.19E-14 |
| rs7953129 | T | G | 0.0755861 | 0.0130243 | 6.5E-09 |
| rs9285019 | C | T | -0.146657 | 0.0134898 | 1.57E-27 |

**Abbreviations:** GDM, gestational diabetes mellitus; SNPs, single-nucleotide polymorphisms

**Table S7** Nine index SNPs of GDM on genetic prediction of left-hand grip strength

| **SNP** | **effect_allele** | **other_allele** | **beta** | **se** | **p value** |
| --- | --- | --- | --- | --- | --- |
| rs117195181 | G | T | 0.215808 | 0.0379065 | 1.25E-08 |
| rs13266634 | C | T | -0.0762399 | 0.012855 | 3.02E-09 |
| rs1402837 | C | T | 0.0974966 | 0.0162506 | 1.98E-09 |
| rs28624681 | C | T | -0.0777647 | 0.0137966 | 1.74E-08 |
| rs34872471 | T | C | 0.163438 | 0.01512 | 3.11E-27 |
| rs76349839 | A | C | -0.208294 | 0.0360235 | 7.38E-09 |
| rs7766070 | C | A | 0.0992973 | 0.0129991 | 2.19E-14 |
| rs7953129 | T | G | 0.0755861 | 0.0130243 | 6.5E-09 |
| rs9285019 | C | T | -0.146657 | 0.0134898 | 1.57E-27 |

**Abbreviations:** GDM, gestational diabetes mellitus; SNPs, single-nucleotide polymorphisms

**Table S8** Ten index SNPs of GDM on genetic prediction of usual walking pace

| **SNP** | **effect_allele** | **other_allele** | **beta** | **se** | **p value** |
| --- | --- | --- | --- | --- | --- |
| rs117195181 | G | T | 0.215808 | 0.0379065 | 1.25E-08 |
| rs1402837 | C | T | 0.0974966 | 0.0162506 | 1.98E-09 |
| rs1574285 | G | T | -0.0710024 | 0.0124482 | 1.17E-08 |
| rs34872471 | T | C | 0.163438 | 0.01512 | 3.11E-27 |
| rs76349839 | A | C | -0.208294 | 0.0360235 | 7.38E-09 |
| rs76895963 | T | G | -0.263052 | 0.0398216 | 3.95E-11 |
| rs7766070 | C | A | 0.0992973 | 0.0129991 | 2.19E-14 |
| rs780094 | T | C | 0.10462 | 0.013085 | 1.29E-15 |
| rs7953129 | T | G | 0.0755861 | 0.0130243 | 6.5E-09 |
| rs9285019 | C | T | -0.146657 | 0.0134898 | 1.57E-27 |

**Abbreviations:** GDM, gestational diabetes mellitus；SNPs, single-nucleotide polymorphisms.

**Supplementary Figures:**

**
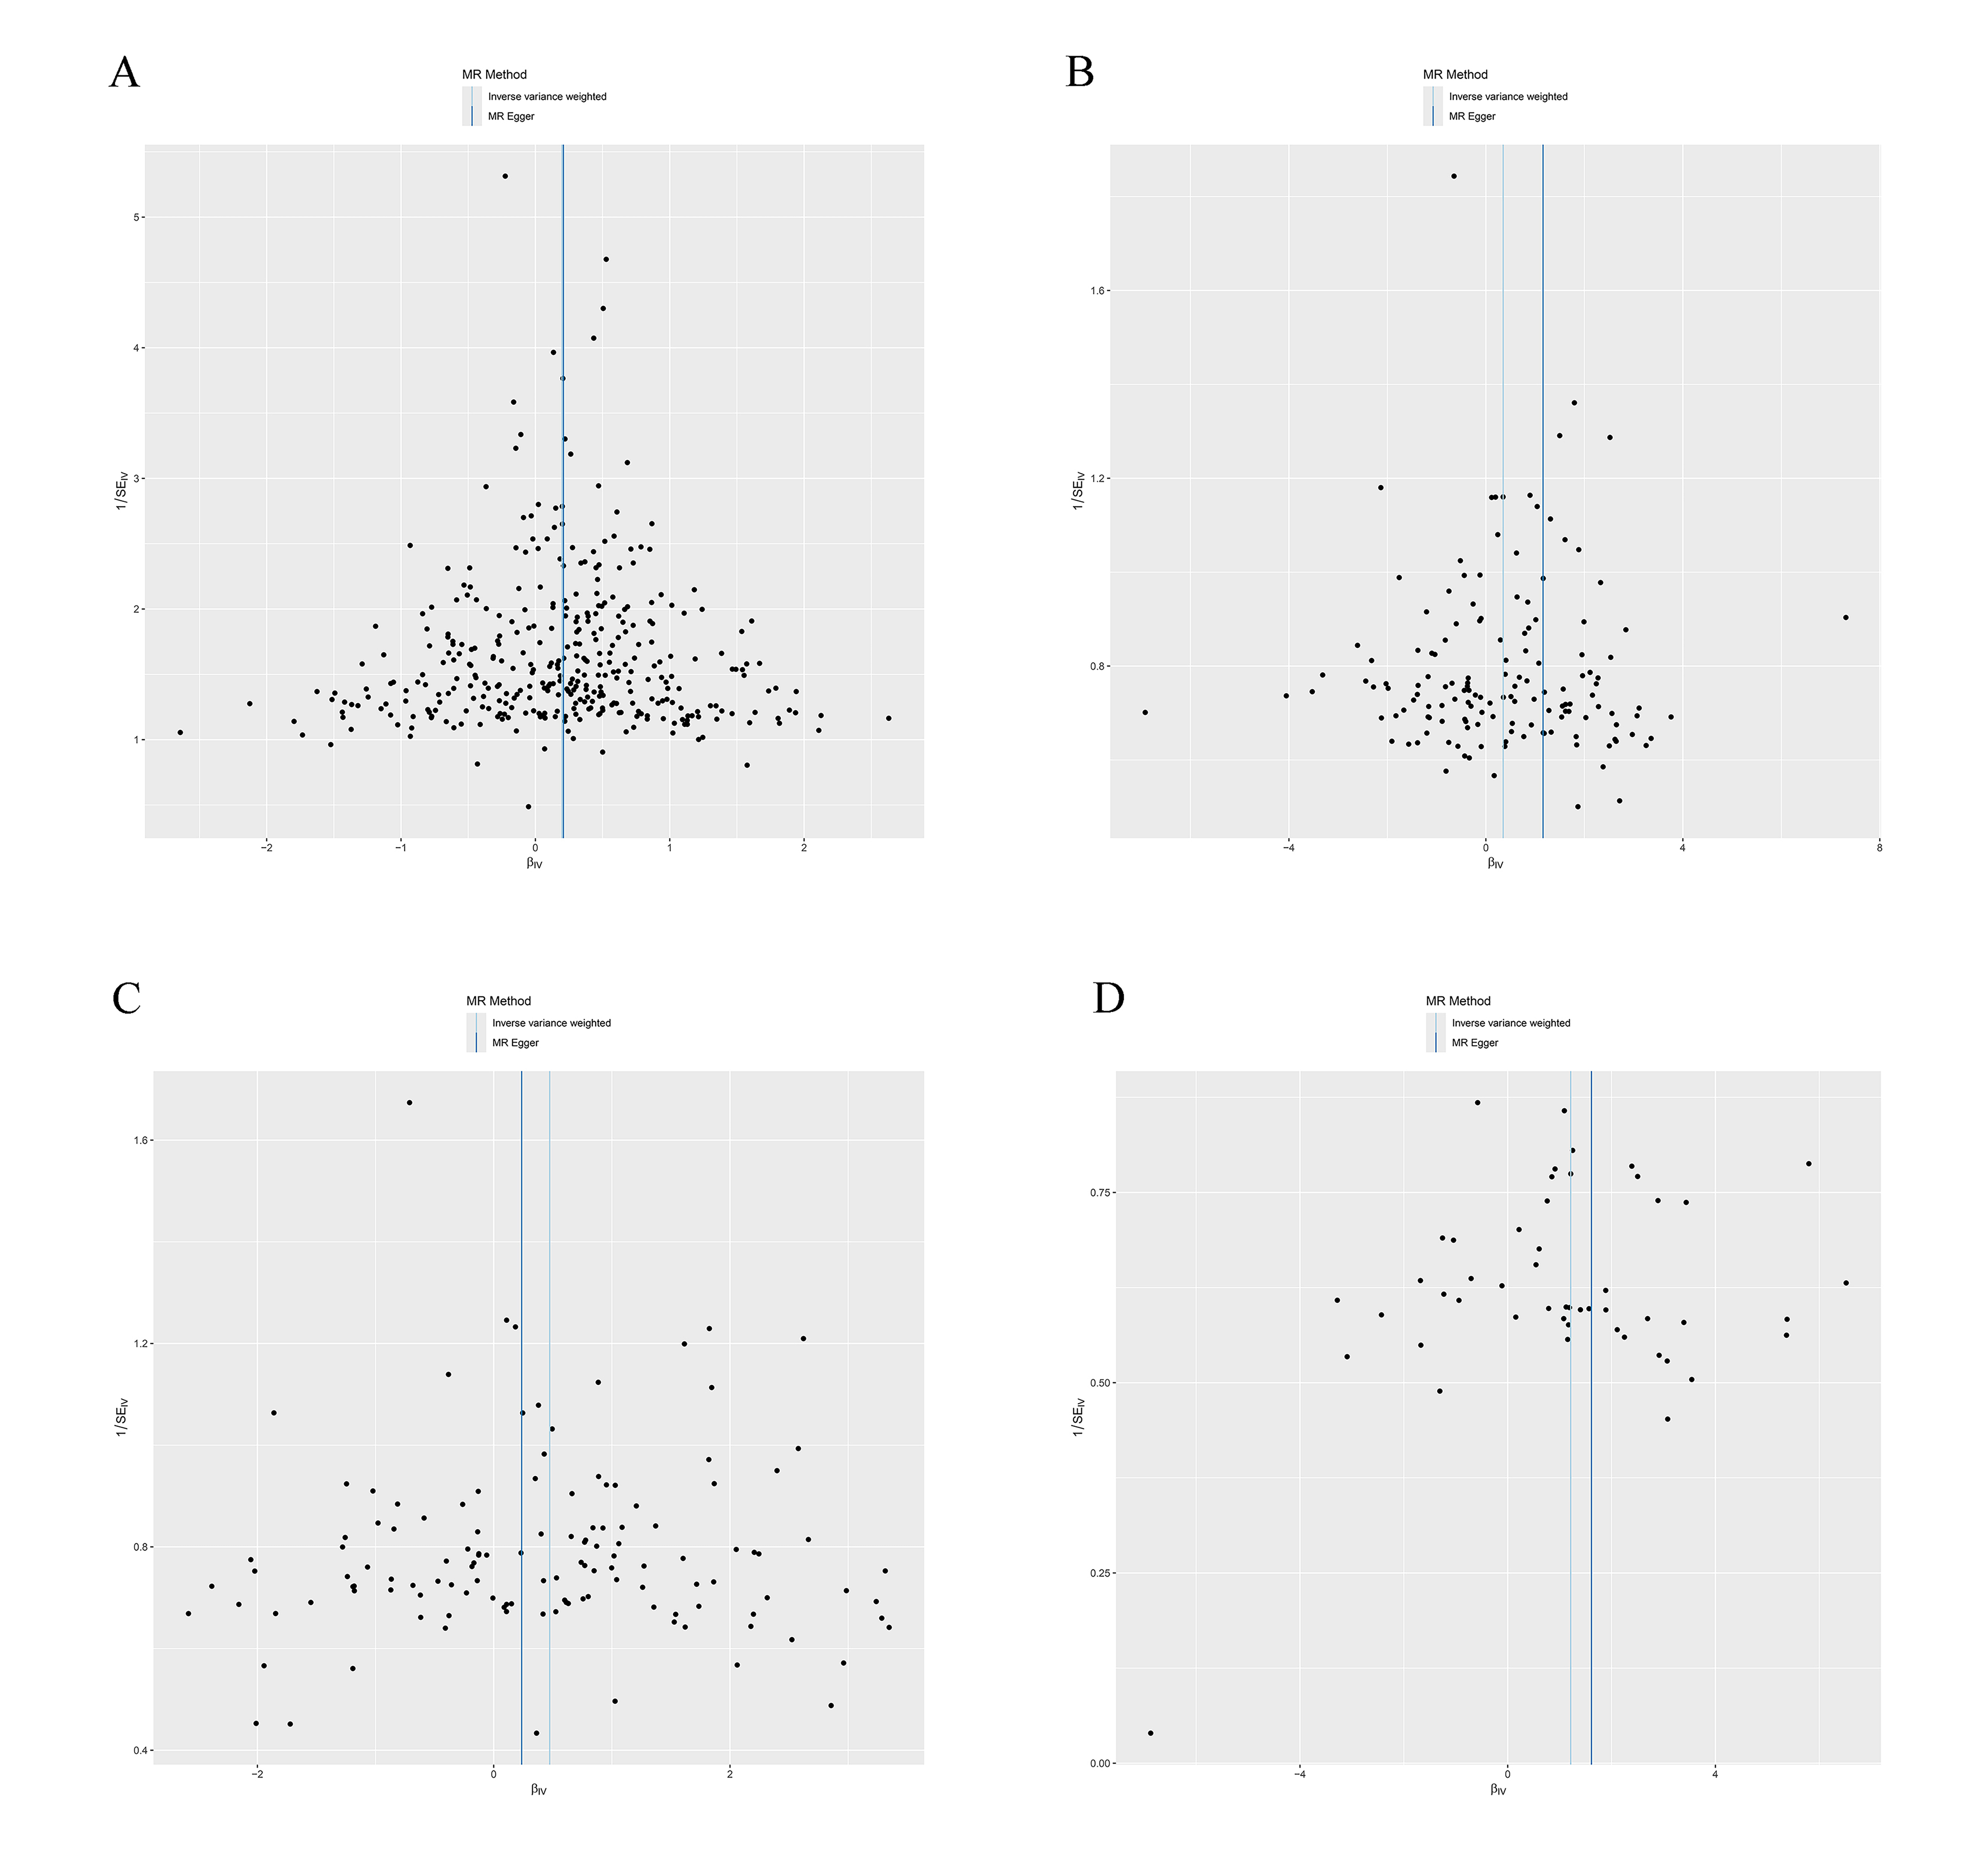
**

**Figure S1** Funnel plot of the causality of sarcopenia on GDM. (A) Appendicular lean mass. (B) Grip strength (Right). (C) Grip strength (Left). (D) Usual walking pace. Abbreviations: GDM, gestational diabetes mellitus; MR, Mendelian randomization.


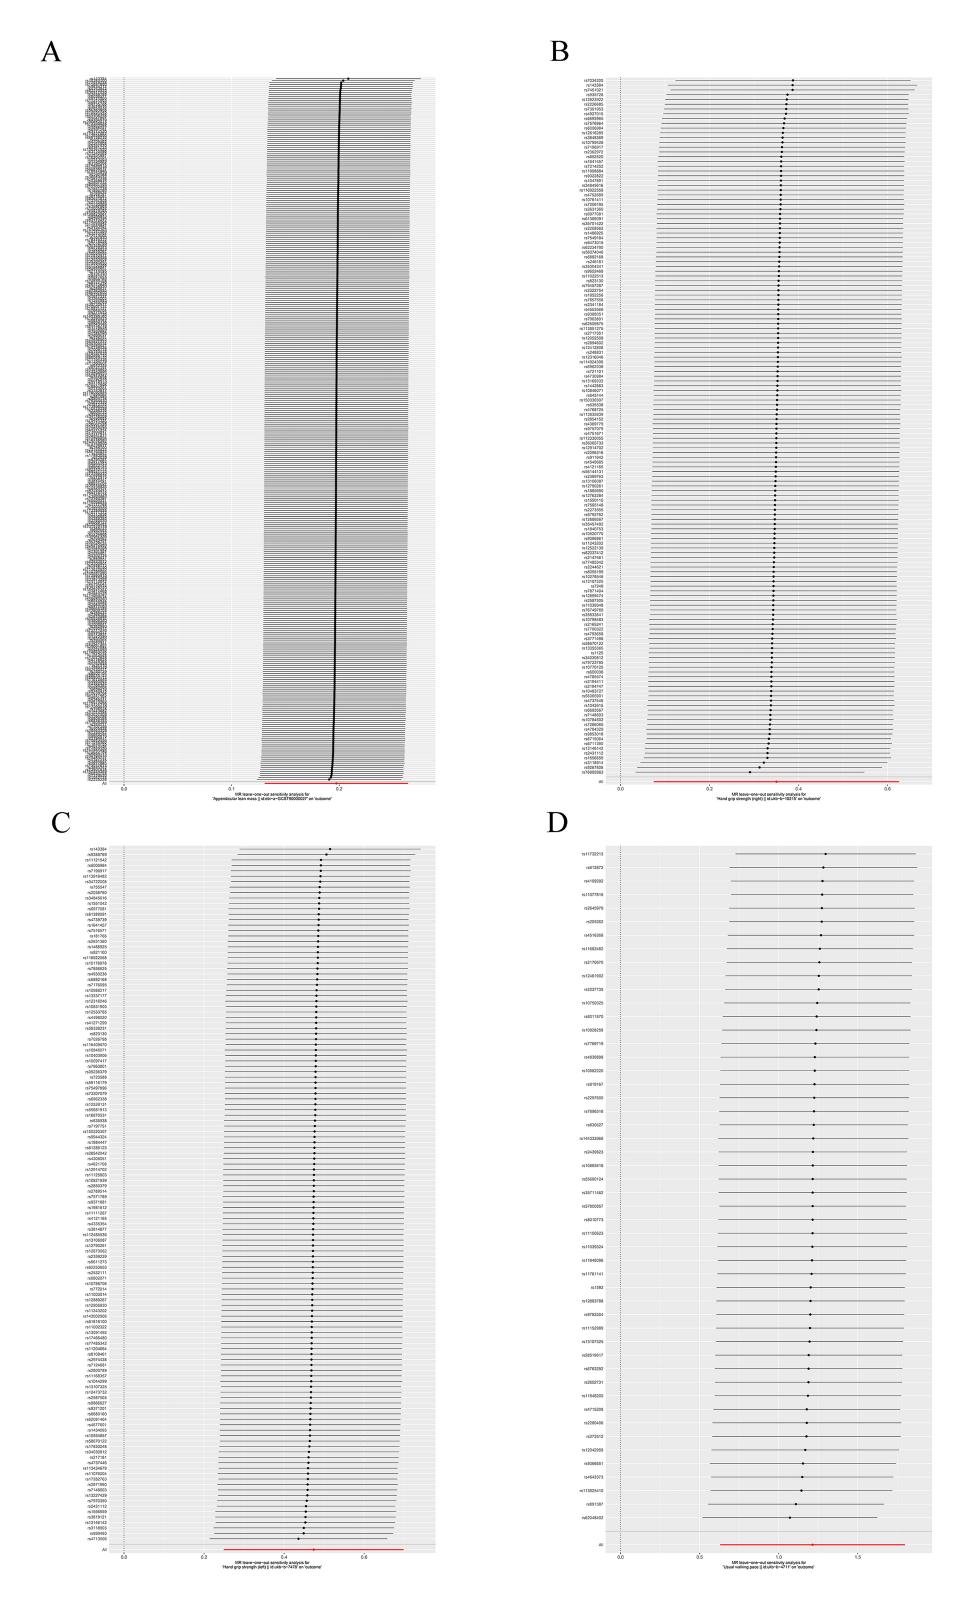


**Figure S2** Leave-one-out analysis of the causal effect of sarcopenia on GDM. (A) Appendicular lean mass. (B) Grip strength (Right). (C) Grip strength (Left). (D) Usual walking pace. Abbreviations: GDM, gestational diabetes mellitus; MR, Mendelian randomization.


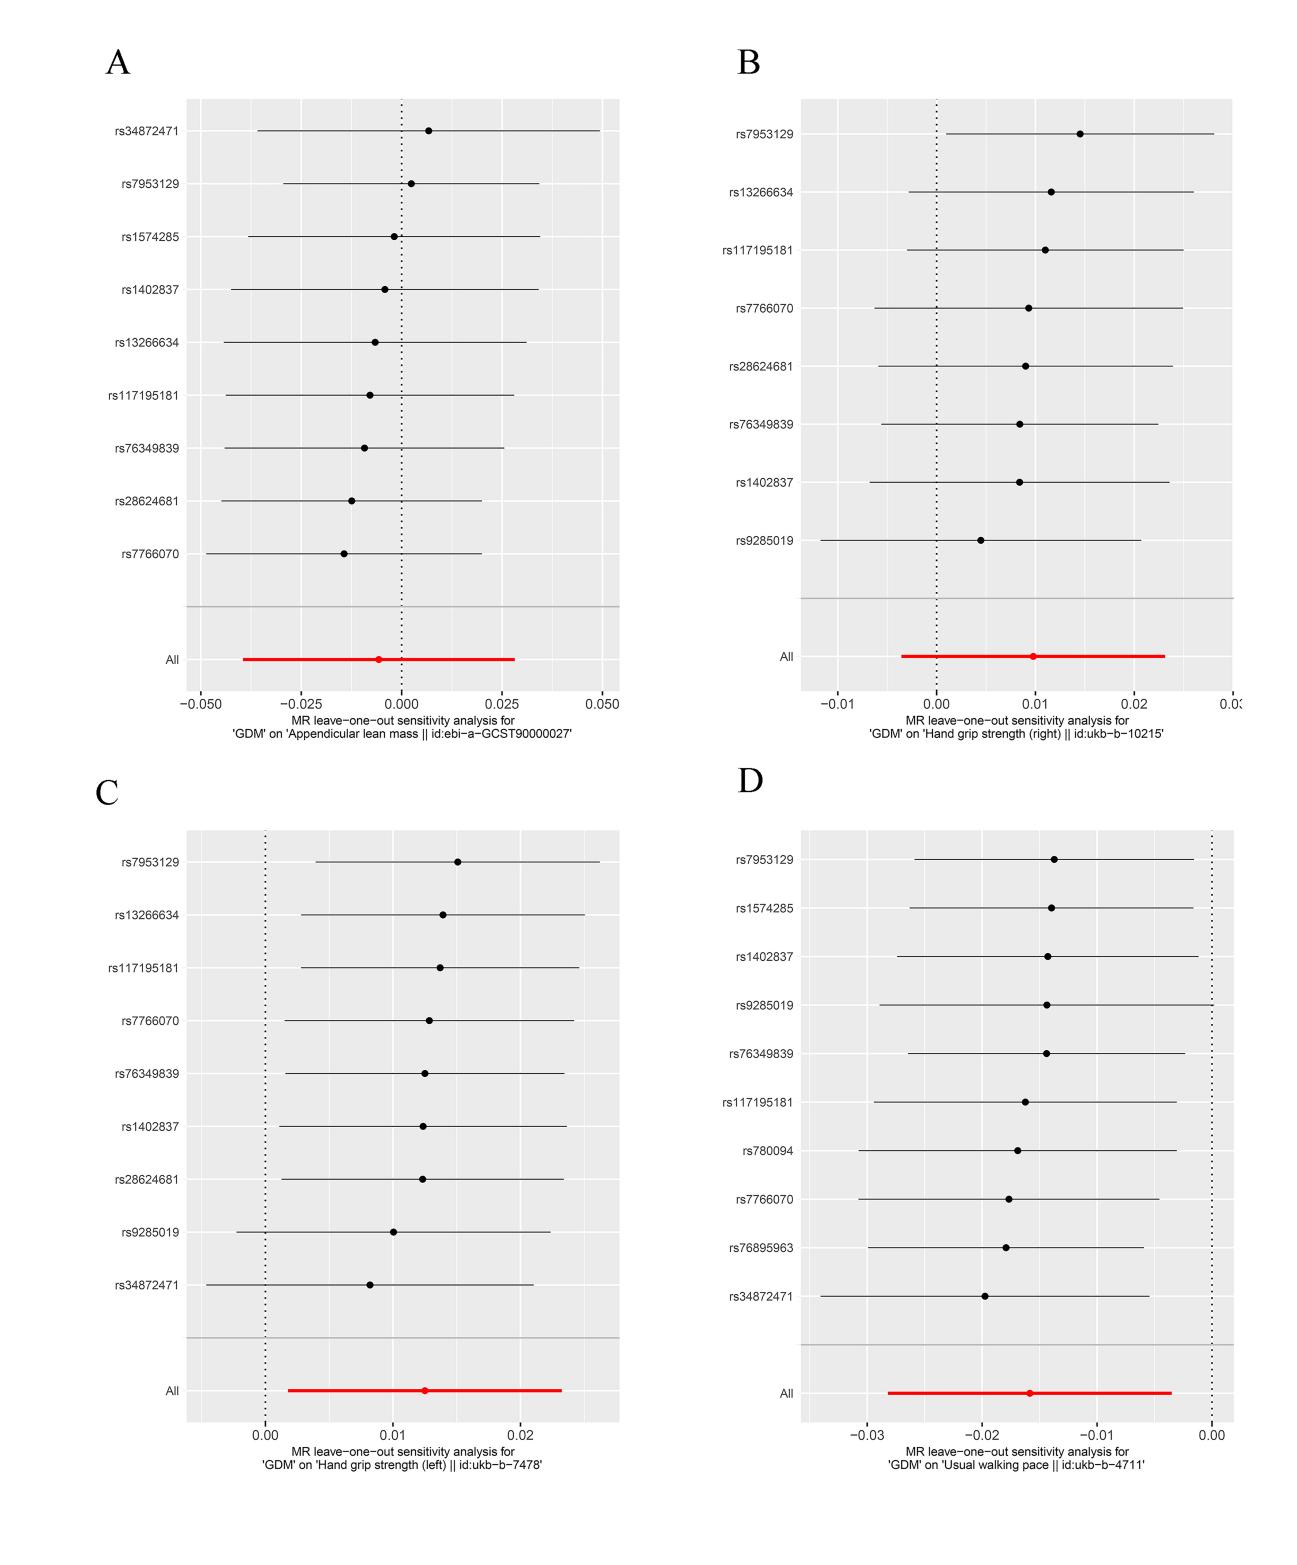


**Figure S3** Leave-one-out analysis of the causality of GDM on sarcopenia. (A) Appendicular lean mass. (B) Grip strength (Right). (C) Grip strength (Left). (D) Usual walking pace. Abbreviations: GDM, gestational diabetes mellitus; MR, Mendelian randomization.
